# Supplementary material
Source: publisher site journal article supplement (https://www.degruyterbrill.com/publication/isbn/9783839467046/downloadAsset/9783839467046_Leseprobe.pdf)
Supplement: Supplementary file 1 [file 9783839467046_Leseprobe.pdf]

Juliane Kanitz, Thorsten Moos,  
Christopher Zarnow

# RELIGION IM URBANEN RAUM

Neue Stadtquartiere  
und ihre religiöse Topographie

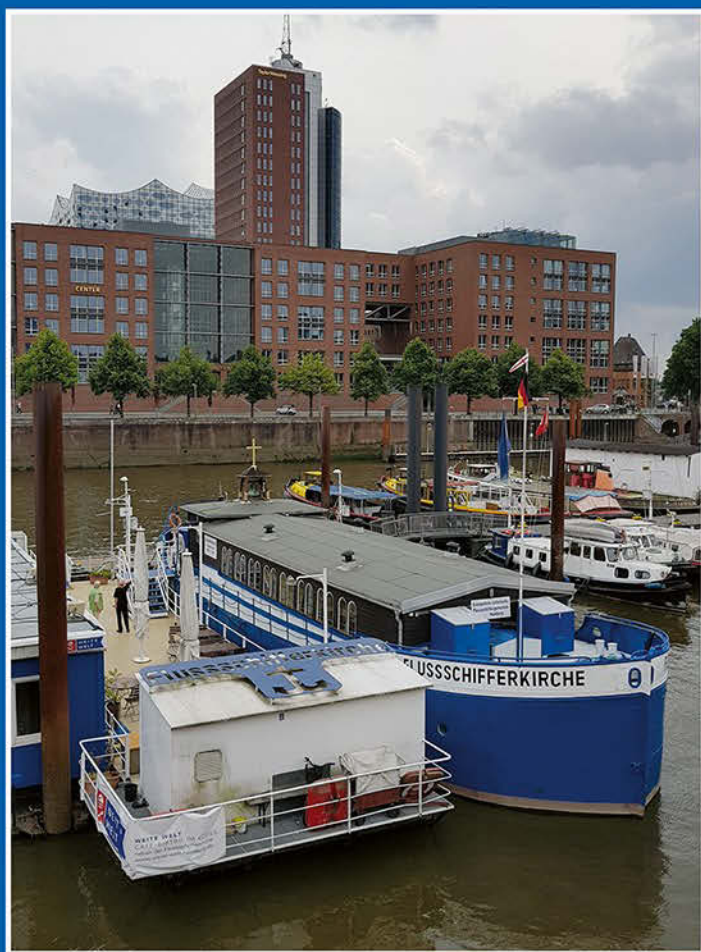

[transcript] urban studies

**Aus:**

*Juliane Kanitz, Thorsten Moos, Christopher Zarnow*

## **Religion im urbanen Raum**

### **Neue Stadtquartiere und ihre religiöse Topographie**

September 2023, 334 S., kart., 2 SW-Abb., 11 Farbbabb.

49,00 € (DE), 978-3-8376-6704-2

E-Book:

PDF: 48,99 € (DE), ISBN 978-3-8394-6704-6

Religion existiert nicht im luftleeren Raum. Sie ist gebunden an Orte und Gebäude, lokale Gepflogenheiten und regionale Mentalitäten. Auch die vermeintlich säkulare Stadt erweist sich bei näherer Betrachtung als religiös geprägter Raum. Kirchtürme und Minarette sind weithin sichtbare Manifestationen von Transzendenz. Umgekehrt schreiben sich die Materialität des Stadtraums, seine soziale Schichtung und kulturelle Diversität in das religiöse Leben ein. In einer qualitativ-empirischen Untersuchung neuer Stadtquartiere beschreiben die Autor\*innen Prozesse und Strukturen der Ver-räumlichung von Religion im urbanen Raum und interpretieren diese vor dem Hintergrund aktueller sozialwissenschaftlicher Debatten.

**Juliane Kanitz** (Dr. phil.), geb. 1984, ist Islamwissenschaftlerin und Europäische Ethnologin. Sie forscht, evaluiert und berät für das i-unto Institut für Praxisforschung Extremismuspräventionsprojekte. Davor forschte sie im Rahmen ihrer Postdocarbeit für die Forschungsstätte der Evangelischen Studiengemeinschaft e.V. (FEST) im Projekt »Religion in neuen Stadtquartieren«. Ihre Arbeitsschwerpunkte sind religiös begründeter Extremismus und Verschwörungstheorien.

**Thorsten Moos** (Dr. theol.), geb. 1969, ist Professor für Systematische Theologie (Ethik) an der Theologischen Fakultät der Ruprecht-Karls-Universität Heidelberg. Er forscht unter anderem zur Systematischen Theologie im Kontext empirischer Wissenschaften, zur theologischen Anthropologie, zu Leiblichkeit und Räumlichkeit, zum Begriff der Krankheit, zu ethischen Grundfragen kirchlichen und diakonischen Handelns sowie zum Sozialen Protestantismus und zur politischen Ethik in historischer und systematisch-theologischer Perspektive.

**Christopher Zarnow** (Dr. theol.), geb. 1975, ist Professor für Systematische Theologie an der Evangelischen Hochschule Berlin. Davor war er Mitbegründer und Leiter der Arbeitsstelle »Theologie der Stadt« der evangelischen Kirche in Berlin. Neben der Erforschung urbaner Religionskulturen gehören zu seinen Forschungsthemen die theologische Anthropologie und Identitätstheorie, die Transformation der Materialdogmatik unter den Bedingungen der Spätmoderne sowie die Entwicklung einer zeitgemäßen Didaktik der Glaubenslehre.

Weitere Informationen und Bestellung unter:  
[www.transcript-verlag.de/978-3-8376-6704-2](http://www.transcript-verlag.de/978-3-8376-6704-2)

© 2023 transcript Verlag, Bielefeld

# Inhalt

---

|                                                                       |     |
|-----------------------------------------------------------------------|-----|
| <b>0. Einleitung</b>                                                  | 9   |
| 0.1 Religion in neuen Stadtquartieren                                 | 9   |
| 0.2 Das Verhältnis von städtischem Raum und Religion                  | 10  |
| 0.3 Die Untersuchung der Quartiere                                    | 21  |
| <b>1. Zentralität</b>                                                 | 27  |
| 1.1 Zentralität als Merkmal städtischer Raumstruktur                  | 27  |
| 1.2 Zentralität als Problem in neuen Stadtquartieren                  | 29  |
| 1.3 Religion zwischen Zentralität und Randständigkeit                 | 41  |
| 1.4 Fazit                                                             | 47  |
| <b>2. Orte</b>                                                        | 49  |
| 2.1 Orte und Verortungen von Religion im städtischen Raum             | 49  |
| 2.2 Die Entstehung religiöser Orte in neuen Stadtquartieren           | 51  |
| 2.3 Religiöse Orte in Beziehung zu ihrer städtischen Umgebung         | 61  |
| 2.4 Fazit                                                             | 69  |
| <b>3. Hybride</b>                                                     | 71  |
| 3.1 Hybridität als Thema und Kategorie empirischer Religionsforschung | 71  |
| 3.2 Religionshybride im urbanen Raum                                  | 75  |
| 3.3 Elemente einer Phänomenologie religiöser Hybridität               | 86  |
| 3.4 Fazit                                                             | 90  |
| <b>4. Wandel</b>                                                      | 93  |
| 4.1 Stadträumlicher Wandel im Spiegel erzählter Geschichte(n)         | 93  |
| 4.2 Religiöse Topographien im Wandel                                  | 96  |
| 4.3 Religiöser Wandel und seine Deutung durch die betroffenen Akteure | 106 |
| 4.4 Fazit                                                             | 114 |

|                                                                                       |     |
|---------------------------------------------------------------------------------------|-----|
| <b>5. Ungleichheit</b>                                                                | 117 |
| 5.1 Religion und soziale Ungleichheit im städtischen Zusammenleben                    | 117 |
| 5.2 Soziale Ungleichheit als Herausforderung von religiösen Gemeinschaften            | 122 |
| 5.3 Ungleichheitskatalysatoren                                                        | 129 |
| 5.4 Fazit                                                                             | 135 |
| <b>6. Öffentlichkeit</b>                                                              | 137 |
| 6.1 Öffentliche Religion und religiöse Öffentlichkeit                                 | 137 |
| 6.2 Religion und Öffentlichkeit: Strategien und Konflikte                             | 141 |
| 6.3 Vier Dimensionen des Verhältnisses von Religion und Öffentlichkeit                | 158 |
| 6.4 Fazit                                                                             | 172 |
| <b>7. Interreligiosität</b>                                                           | 175 |
| 7.1 Religiöse Pluralität und Interreligiosität                                        | 175 |
| 7.2 Interreligiosität als Bewältigung religiöser Diversität                           | 178 |
| 7.3 Interreligiosität als Ideal urbaner Religionskultur                               | 196 |
| 7.4 Fazit                                                                             | 202 |
| <b>8. Organisation</b>                                                                | 205 |
| 8.1 Der Organisationsbegriff im Diskurs der Praktischen Theologie                     | 205 |
| 8.2 Spannungsfelder differenzierter kirchlicher Organisation in neuen Stadtquartieren | 207 |
| 8.3 Entdifferenzierungsexperimente                                                    | 220 |
| 8.4 Fazit                                                                             | 225 |
| <b>9. Akteure</b>                                                                     | 227 |
| 9.1 Akteursrollen im Stadtraum                                                        | 227 |
| 9.2 Die Formierung religiöser Stadtakteure                                            | 229 |
| 9.3 Typen religiös-urbaner Akteure                                                    | 240 |
| 9.4 Fazit                                                                             | 252 |
| <b>10. Engagement</b>                                                                 | 255 |
| 10.1 Religion und bürgerschaftliches Engagement                                       | 255 |
| 10.2 Konflikte als Treiber bürgerschaftlichen Engagements                             | 258 |
| 10.3 Funktionen bürgerschaftlich engagierter Religion                                 | 266 |
| 10.4 Fazit                                                                            | 274 |
| <b>11. Planung</b>                                                                    | 277 |
| 11.1 Religion und Stadtplanung                                                        | 277 |
| 11.2 Religiöse Selbstpositionierungen in städtischen Planungsprozessen                | 279 |
| 11.3 Religion als Faktor und Subjekt von Planung                                      | 289 |
| 11.4 Fazit                                                                            | 297 |

|                                                                               |         |
|-------------------------------------------------------------------------------|---------|
| <b>12. Schluss</b> .....                                                      | 301     |
| 12.1 Grundlegende Aspekte der Forschungsfrage (Kapitel 1-4) .....             | 302     |
| 12.2 Dimensionen städtischer Verräumlichung von Religion (Kapitel 5-11) ..... | 303     |
| 12.3 Impulse für die weitere Forschung .....                                  | 305     |
| <br><b>Literaturverzeichnis</b> .....                                         | <br>307 |
| <br><b>Abkürzungs- und Siglenverzeichnis</b> .....                            | <br>323 |
| <br><b>Abbildungsverzeichnis</b> .....                                        | <br>327 |
| <br><b>Tabellenverzeichnis</b> .....                                          | <br>329 |
| <br><b>Danksagung</b> .....                                                   | <br>331 |

## 0. Einleitung

---

### 0.1 Religion in neuen Stadtquartieren

»Religion« findet nicht im luftleeren Raum statt. Sie manifestiert sich in konkreten Praktiken, Subjekten, Gegenständen, Symbolen, Bildern, Narrativen, gesellschaftlichen und kulturellen Kontexten, Medien und Organisationsformen. Religion hat Räume und Orte. Sie nimmt Wohnung in Städten und ländlichen Regionen. Sie wird aufgesucht in eigens errichteten Kultstätten, in flüchtigen Quartieren oder im öffentlichen Raum. Kirchtürme, Minarette und Pagoden prägen Räume und bieten Orientierung für die, die sich darin bewegen. Umgekehrt beeinflussen räumliche Gegebenheiten Manifestationen des Religiösen. Straßen und Plätze, Infrastrukturen, soziale Schichtung und kulturelle Diversität schreiben sich in das religiöse Leben ein. Religion greift Raum.

Das gilt insbesondere in der Stadt. Phänomene städtischer Religion haben in den letzten Jahrzehnten einige wissenschaftliche Aufmerksamkeit erhalten. Stadtkultur und Religion beeinflussen sich auf mannigfache Weise (Burfeind, Heimbrock, Spory 2009; Steck 2011; Becker et al. 2014). Empirische Untersuchungen, die versuchen, diese wechselseitige Beeinflussung näher zu analysieren, gibt es allerdings nur wenige – zumal im deutschen Sprachraum. An diesem Forschungsdesiderat setzt die vorliegende Studie an. Sie fragt danach, wie Religion und urbaner Raum miteinander verflochten sind und sich gegenseitig definieren, produzieren und beeinflussen. Dabei werden nicht nur der Begriff des (städtischen) Raums, sondern auch der Religionsbegriff als mehrdimensionale Größen gefasst. In dieser Hinsicht hebt sich die vorliegende Studie auch von anderen vergleichbaren Untersuchungen ab, die oft mit einem eindimensionalen Verständnis von Religion arbeiten, insofern diese als »sozialer Tatbestand« vorausgesetzt bzw. als fixes Attribut einer sozialen Gruppe konzeptualisiert wird. Demgegenüber liegt der inhaltliche Schwerpunkt des Folgenden gerade darin, Religion *im Raum* als eine Größe zu adressieren, die sich je nach eingenommener Beschreibungsperspektive auf unterschiedliche Weise *als Religion* zeigt.

Der spezifische Ansatz der vorliegenden Untersuchung besteht darin, Prozesse und Strukturen der Verräumlichung von Religion exemplarisch anhand von *neuen Stadtquartieren* zu analysieren. Dieser Fokus wurde aus einem doppelten Grund gewählt. Zum einen lässt sich hier beobachten, wie räumliche Strukturen von Religion sich überhaupt

erst entwickeln und allmählich herausbilden. Durch den Zuzug neuer Stadtteilbewohner:innen kann neues religiöses Leben entstehen. Bewohner:innen bringen unterschiedliche religiöse Prägungen mit und verorten sich in einem religiös und weltanschaulich pluralen Umfeld. Zum anderen werden neue Stadtquartiere von den etablierten Religionsgemeinschaften ausdrücklich als Erprobungsräume ausgezeichnet, in denen mit neuen Präsenzformen experimentiert wird. Gebäude werden geplant und bezogen, im Stadtraum werden Feste gefeiert und Rituale begangen, soziale Dienstleistungen und kulturelle Angebote für die eigene Gruppe, für den Stadtteil, für die Stadt ins Werk gesetzt. Häufig sind Religionsgemeinschaften Partner der Städte und Kommunen, wenn es um Fragen des gedeihlichen Zusammenlebens geht. Gerade im Bereich der christlichen Kirchen sind die Modelle und Vorhaben vielfältig und reichen von der Erweiterung und Intensivierung bestehender Strukturen über die Etablierung ökumenischer Zentren und Foren bis hin zu Neugründung von Gemeinden.

Die genannten Faktoren machen neue Stadtquartiere zu besonders interessanten, aber auch anspruchsvollen Gegenständen der empirischen Religionsforschung. Dabei wird der Begriff eines »neuen« Stadtquartiers weit gefasst: nämlich im Sinne von Neubau- wie auch von Konversionsquartieren, was unterschiedliche Phasen ihrer Entwicklung zulässt (als Entwicklungsgebiet ausgezeichnet, in Planung und/oder im Bau befindlich; bereits fertiggestellt).

*Wie greift Religion Raum in neuen Stadtquartieren?* Diese forschungsleitende Hauptfrage wird im Folgenden angesichts der unüberschaubaren Vielfalt und Diversität urbaner Religionskulturen nicht abstrakt-allgemein, sondern anhand von verdichtet beschriebenen und analytisch aufbereiteten Konstellationen bearbeitet. Dazu wird mittels des mit den Begriffen »Religion« und »Raum« aufgespannten Theorierahmens (0.2) ein qualitativ-empirisches Forschungsdesign entwickelt (0.3). Eine Zusammenfassung der Forschungsergebnisse ist am Ende jedes der folgenden Kapitel aufgenommen; ihre Verbindung zu einem gesamten Narrativ findet sich am Schluss des Buches.

## 0.2 Das Verhältnis von städtischem Raum und Religion

Im Folgenden sollen zunächst der Forschungskontext zum Wandel urbaner Religionskulturen skizziert (0.2.1) und anschließend der theoretische Horizont sowie einige zentrale Begriffe, die dem Forschungsdesign zugrunde liegen, näher in den Blick genommen werden – namentlich die Begriffe des Raums (0.2.2), der Stadt (0.2.3) und der Religion (0.2.4). Aus ihnen leitet sich die der Studie zugrundeliegende Forschungsheuristik ab (0.2.5). Dabei kann es hier nicht darum gehen, umfängliche begriffs- und forschungsgeschichtliche Theoriearbeit zu leisten – dafür sei auf die angeführte Sekundärliteratur verwiesen. Ziel der folgenden Erläuterungen ist es vielmehr, die für die Studie leitenden Referenztheorien und begrifflichen Differenzierungen zu markieren.

## 0.2.1 Transformationen urbaner Religionskultur

Die urbane Religionskultur befindet sich im Wandel.<sup>1</sup> Doch gilt das tatsächlich für die religiöse Lage selbst, oder hat sich nur die wissenschaftliche Ökonomie der Aufmerksamkeit verschoben? Was letztere angeht, lässt sich jedenfalls eine regelrechte Trendwende innerhalb der Urbanistik beobachten. Bis in die 1980er Jahre hinein herrschte, was die Bestimmung der religiösen Lage in den Städten angeht, innerhalb der Sozialwissenschaften ein einliniges Säkularisierungsnarrativ vor: Die Großstadt galt als Höhepunkt und Speersitze der gesellschaftlichen Modernisierung; das Wesen der Moderne wurde wiederum als religionsfeindlich und säkular definiert (Joas 2013). Aufgrund dieser Vorannahmen ging man davon aus, dass sich moderne Stadtkultur und Religion gleichsam a priori gegenseitig ausschlossen.<sup>2</sup>

Demgegenüber hat sich der Debattenfokus in jüngerer Zeit gründlich verschoben. Religion und religiöser Pluralismus sind zu zentralen Themen der Stadtforschung geworden. So untersuchte im *Global-Prayers*-Projekt eine interdisziplinäre Forschergruppe die Wechselbeziehungen zwischen religiösen Initiativen und städtischem Sozialraum auf ihre soziologischen, kulturellen und ökonomischen Gesetzmäßigkeiten hin (Becker et al. 2014). Forschungen fanden unter anderem in Mexico City, Lagos, Berlin, Istanbul und Rio de Janeiro statt. In faszinierenden Detailstudien konnte nachgezeichnet werden, wie verschiedenartig und vielfältig religiöse Gruppen auf ihre urbanen Kontexte Bezug nehmen und umgekehrt von ihrer städtischen Umgebung beeinflusst werden. Überall verzeichnen die Forschenden, die vorrangig ethnologisch gearbeitet haben, vitale, hochdifferenzierte Religionsmärkte in den Metropolen der Gegenwart, die den urbanen Raum prägen und selbst von ihm geprägt werden.

Religiöser Pluralismus ist Schwerpunktthema auf urbanistischen Fachtagungen, die Entstehung und der Wandel von »Glaubenstopographien« Gegenstand ethnologischer Fallstudien (Becci, Burchhardt, Casanova 2013). Hier zeichnet sich ein grundlegender Paradigmenwechsel ab: Nicht die einseitig als säkular verstandene Stadt, sondern die *global city* als religionsproduktiver Ort mit ihren differenzierten Religionskulturen fasziniert Forscherinnen und Forscher über disziplinäre Grenzen hinweg.

Nun kann man, wie angedeutet, fragen, ob diese erneute wissenschaftliche Aufmerksamkeit der Religionsthematik sich ausschließlich innerbetrieblichen akademischen Konjunkturschwankungen verdankt oder auch einen Anhaltspunkt in der Sache selbst hat. Diese Frage ist naturgemäß schwer zu beantworten. Fakt ist, dass die Zahl der eingetragenen evangelischen und katholischen Kirchenmitglieder etwa in Berlin bei knapp 20 Prozent der Gesamtbevölkerung liegt, Tendenz fallend (Stand: Ende 2022). Fakt ist auch, dass eine Studie vom Beginn des Jahrtausends über 350 verschiedene Religionsgemeinschaften für dieselbe Stadt verzeichnet, teilweise mit verschwindend kleiner Anzahl an Mitgliedern (Grübel, Rademacher 2003). Jetzt ließe sich trefflich darüber streiten, auf welche Begriffe man diese Befunde bringen will – ob man diese

---

1     Formulierungen aus den folgenden Abschnitten sind teilweise wörtlich übernommen aus Zarnow 2018a.

2     Diese apriorische Setzung liegt auch dem theologischen Klassiker von Harvey Cox aus dem Jahr 1965 zugrunde: *Secular City. Secularization and Urbanization in Theological Perspective* (Cox 1971).



Lage als säkular oder post-säkular oder noch anders bezeichnen möchte. So oder so ist festzuhalten, dass wir es in den Großstädten mit einer fortschreitenden Differenzierung und Pluralisierung, aber auch mit punktuellen Vitalisierungen der Religionskultur zu tun haben. Die säkulare Großstadt ist in vielerlei Hinsicht ein religionsproduktiver Ort (Zarnow 2018b).

Eine neue Aufmerksamkeit für die Stadt ist vielerorts auch in den christlichen Kirchen zu spüren. Der urbane Raum wird als Erprobungsraum für neue Formen des Gemeindeaufbaus entdeckt, dritte Orte entstehen, an denen neue Formen der Spiritualität ausprobiert werden können, Sonderpfarrämter werden eingerichtet, um Strategien kirchlichen Handelns in neu Stadtgebieten zu entwickeln. Kurz: Der urbane Raum wird als Labor und Experimentierfeld religiöser Praxis neu entdeckt. Dabei kann es als Aufgabe der empirischen Religionsforschung angesehen werden, die komplexen Konfigurationen, in denen Religion in den städtischen Raum eingeschrieben ist, differenziert zu beschreiben. In theologischer Hinsicht ist darüber hinaus zu fragen, welche existenziellen Themen mit dem Erfahrungsraum der urbanen Alltagswelt verbunden sind. In der Großstadt als Laboratorium der Moderne verdichten sich Erfahrungen der Individualisierung und Beschleunigung, der Fragmentierung von Identitäten, der Anonymisierung des Lebens. Die Erschließung solcher großstädtischen Differenzerfahrungen im Lichte der christlichen Glaubenstradition gehört zu den zentralen Aufgaben einer theologischen und kirchlichen Praxis, die sich religionssensibel auf ihre urbane Lebenswelt einlassen will. Diese Praxis bedarf wiederum einer differenzierten Wahrnehmung eben jener Lebenswelt, zu der die vorliegende Studie beitragen soll.

## 0.2.2 Raum

Raubegriff und Raumtheorie sind seit einiger Zeit ins Zentrum sozial- und kulturwissenschaftlicher Debatten gerückt (Günzel 2022). Im Zuge dessen wurde vor noch gar nicht allzu langer Zeit ein *spatial turn*, eine raumwissenschaftliche Wende der Kulturwissenschaften, ausgerufen. Raum wird in diesem Kontext nicht (mehr) als selbstverständlich gegebene Größe gesehen, in dem sich das (erforschte, beobachtete) Geschehen abspielt, sondern selbst auf seinen sozialen, politischen und symbolischen Konstruktionscharakter hin befragt (Döring, Thielmann 2009). Produktive Impulse gehen von der Raumtheorie insofern in die Stadtforschung aus, als die urbane Alltagswelt ihrerseits als eine komplexe Konfiguration von in sich verschachtelten Lebens-, Sozial- und Kulturräumen beschrieben werden kann (Manderscheid 2004).<sup>3</sup>

Eine paradigmatische Vorreiterrolle in Bezug auf raumtheoretische Fragen kommt der *Sozial- bzw. Humangeographie* zu, die sich »mit den von Menschen geschaffenen und gekennzeichneten räumlichen Verhältnissen und Gliederungen« (Werlen 2012: 142) beschäftigt. Menschliches Handeln vollzieht sich nicht nur im Raum – Menschen handeln Räume aus, sie gestalten und streiten um Räume, und in alldem agieren sie raumschaffend. Eine besondere Weise raumkonstruktiver Tätigkeit kann in der Herstellung »emo-

3 »Urbane Raum ist ein dynamisches Gefüge und kann somit nur in der Komplexität von Orten und Institutionen, Akteuren und Aktivitäten, Erfahrungen und Erzählungen betrachtet werden« (Huffschmid, Wildner 2009).

tionale[r] und symbolische[r] Ortsbezüge« (Werlen 2012: 145) gesehen werden. In solchen Ortsbindungen – die für religiöse Menschen etwa in der Bindung an ein bestimmtes Gotteshaus liegen können – manifestiert sich in prägnanter Form die »Räumlichkeit« des Daseins als eine existenzielle Grundstruktur des Lebens (Bollnow 2010). Ausgezeichnet sind solche Orte insbesondere durch die Rolle, die sie in der eigenen Lebensgeschichte oder auch in der Geschichte einer Gruppe spielen. Gerade solche Orte, zu denen Akteure eine subjektive und emotionale Verbindung und Zugehörigkeit verspüren (*sense of place*), können dabei als »Schauplätze[] oder *actions settings*« (Werlen 2012: 145) verschiedenen Möglichkeiten von Interaktion eine Bühne geben.

Dabei lässt sich Raum auf verschiedenen Ebenen adressieren. Henri Lefebvre zufolge lässt sich der (urbane) Raum auf den drei Ebenen der lebensweltlichen Erfahrung, der ideologischen Ordnung sowie der symbolischen Imagination beschreiben (Lefebvre 1990: 1994, Huffscheid, Wildner 2009). Dieter Läßle unterscheidet in seinem Modell des Matrix-Raumes (Läßle 1991: 196ff) zwischen dem gesellschaftlich produzierten materiell-physischen Substrat (Artefakte, materielle Nutzungsstrukturen), der gesellschaftlichen Praxis, dem institutionalisierten und normativen Regulationssystem (Eigentumsformen, rechtliche Regelungen, Planungsrichtlinien) sowie einem Zeichen-, Symbol- und Repräsentationssystem (Frey 2012: 511; Wehrheim 2011: 164). Dies zusammengefasst kann Raum zunächst in den Blick genommen werden als *physikalisch-materielle* Größe, die sich über Koordinaten und Entfernungsangaben bestimmen lässt und eine spezifische physisch-materielle Charakteristik aufweist. Allerdings zeigen schon die verschiedenen Möglichkeiten, ihn zu vermessen und zu kartieren, dass die Erschließung des physikalischen Raumes immer schon von bestimmten gesellschafts- und kulturellen Ordnungsvorstellungen überformt ist. Der geographisch-materielle Raum und der *soziale* Raum sind folglich nicht getrennt zu betrachten, sondern stehen in einem Wechselverhältnis zueinander (Schneider 2012: 97–99; Wehrheim 2011: 166): So wie sich soziale Verhältnisse räumlich ausformen, verweist die Ordnung des Raumes auf soziale Aushandlungspraktiken und Konventionen zurück.<sup>4</sup> Räume lassen sich aber auch *administrativ* – etwa als Verwaltungseinheiten (Parochie, Kirchenkreis, Stadtdekanat) bestimmen, die einen bestimmten territorialen Zuschnitt mit einem bestimmten Grenzverlauf haben. Räume sind Gegenstand von Mythenbildungen, Phantasien, Erzählungen und *diskursiven Zuschreibungen*, die beispielsweise mit der Gründerzeit eines Stadtgebiets verbunden sind. Räume können so zu *Symbolen* für Erwartungen, aber auch für enttäuschte Hoffnungen werden, an denen Erinnerungen und Lebensentwürfe haften. Diese unterschiedlichen Beschreibungsperspektiven werden in Abschnitt 2.5 erneut aufgegriffen, wenn die Forschungsheuristik entwickelt wird, die der vorliegenden Untersuchung zugrunde liegt.

---

4 Dass der Raum aus soziologischer Perspektive nicht als das »Worin« sozialer Gegebenheiten zu verstehen ist, sondern sich im Vollzug und als Resultat sozialer Handlungen überhaupt erst konstituiert, ist die zentrale These des Buchs von Martina Löw: Raumsoziologie (Löw 2012).

### 0.2.3 Stadt

Der Begriff der Stadt wird in der neueren Stadtsoziologie kontrovers diskutiert. In welcher Form ist »die Stadt« überhaupt einer empirischen Fragestellung zugänglich? Können Städte als solche Gegenstände soziologischer Forschung sein – oder nur ihre Bewohner bzw. das Leben, das sich in ihnen abspielt? Soll die Stadt als Ort der Verdichtung gesamtgesellschaftlicher oder gar globaler Prozesse in den Blick genommen werden, als »gesellschaftliche Organisationsform der Moderne« (Dangschat 1994: 337) oder als die je konkrete Stadt in Gestalt eines Habitus-Ensembles mit je spezifischer »Eigenlogik« (Berking, Löw 2005)? Insbesondere von der neueren Raumsoziologie sind wichtige Impulse für die gegenwärtige Stadtforschung und Urbanistik ausgegangen. In den Fokus rücken damit die Mechanismen und Praktiken, durch die urbane Räume hergestellt, verteilt, verwaltet und ausgehandelt werden (Schroer 2012).

Ein solcher »raumkonstruktivistischer« Ansatz lässt sich wiederum auf verschiedenen Ebenen konkretisieren. Auf *materieller* Ebene kann eine Stadt als eine große Siedlung verstanden werden, deren Umwelt weitgehend von Menschen geschaffen wurde und deren baulich-räumliche Struktur im Vergleich zum Land stark verdichtet ist (Antweiler 2004: 286; Miege 2013: 6). Auf *sozialer* Ebene stellt sich eine Stadt als ein spezifischer Modus sozialer Organisation dar, der das Verhalten von Individuen und Gruppen formt und ihrerseits von ihnen geformt wird (Schwanhäußer 2010). Die Stadt ist dabei durch die Mannigfaltigkeit ihrer sozialen Gruppen geprägt und hat einen Verbandscharakter, der wesentlich durch Integration bestimmt ist: Anders als das Territorium ist insbesondere die Großstadt nicht durch Ausschluss (territoriale Grenzen), sondern durch Einschluss definiert (Berking 2015). Öffentliche Räume in der Stadt, wie beispielsweise Plätze, Straßen oder Park-Anlagen, sind potenziell allen Teilen der Stadtbevölkerung zugänglich. Auf der anderen Seite führen Effekte der sozialräumlichen Segregation zur Herausbildung relativ geschlossener Areale, in denen sich Menschen verschiedener sozialer und kultureller Milieus im Alltag kaum begegnen. Der Raum der Stadt ist so durch die Wechselbeziehung und Polarisierung von öffentlicher und privater Sphäre bestimmt (Bahrds 1969).<sup>5</sup> Durch Privatisierung und Kommerzialisierung öffentlicher Räume und umgekehrt durch die Ausdehnung des Privaten ins Öffentliche (*urban gardening* und andere Techniken des Alltagsurbanismus) entstehen dabei zunehmend Mischformen, also Graubereiche, die weder klar der einen, noch der anderen Sphäre zuzuordnen sind.

Städte sind aber nicht nur Orte des alltäglichen Lebens sowie der sozialen Interaktion und Partizipation, sondern auch behördlich gesteuerte Verwaltungseinheiten. Aus *administrativer* Sicht erscheinen Städte als »Träger kommunaler Autonomie bzw. lokaler Selbstverwaltung« (Miege 2013: 8). Entscheidungen, die alle Bewohner des Gebietes betreffen, werden in spezifischen Foren ausgehandelt, getroffen und durchgeführt. Auf *diskursiver* Ebene kann betrachtet werden, wie unterschiedliche Akteure der Stadt als ganzer, aber auch einzelnen Stadtvierteln unterschiedliche Bedeutungen zuschreiben.

5 Bahrds Anschauungsobjekt ist die Stadt der bürgerlichen Gesellschaft. Welche analytische Kraft sein stadt(planungs)soziologischer Ansatz für gegenwärtige Stadtentwicklungen besitzt, hängt damit zusammen, wie die Prägekräft der »bürgerlichen« oder auch »europäischen« Stadt für die »Zwischenstädte« (Sieverts 2013) der Gegenwart eingeschätzt wird.

Akteure sind beispielsweise die Bewohnerinnen, Stadtplaner, Journalistinnen oder Mitglieder religiöser Gemeinschaften. Deren Wirklichkeitsdeutungen, etwa hinsichtlich der Geschichte und der Individualität der Stadt, werden insbesondere in lokalen Medien und auf öffentlichen Veranstaltungen entworfen und ausgehandelt sowie stabilisiert und transformiert (Christmann 2006: 600). Städte sind zugleich Projektionsflächen und Referenzpunkte von Diskursen und Narrativen. Sie sind mit bestimmten Etikettierungen verbunden – wie Berlin als die »gottloseste Stadt Europas« oder die »weltoffene« Hansestadt Hamburg. Solche Narrative sind teilweise tief in der Geschichte verwurzelt und werden in unterschiedlichen Medien immer wieder aktualisiert, wiederholt und dadurch legitimiert. Zudem werden sie im Stadt-Marketing mit dem Ziel aufgegriffen, ein »Image« der Stadt herauszustellen und dieses im Konkurrenzkampf der Städte zu behaupten (Löw 2010). Zugleich finden sich in der Stadt die *Symbole* unterschiedlicher sozialer Gruppen wieder, seien es Graffiti an Häuserwänden oder Kreuze auf Kirchturmspitzen. Diese Symbole stehen in komplexen Relationen wechselseitigen Verweisens. Aber auch Namensgebungen sind Teil symbolhafter Praktiken und geben oft Auskunft über die Selbstverortung der Akteure.

Städte sind zudem der Ort von *Praktiken*, durch die sie bestimmt werden und die sie ihrerseits transformieren. Eine spezifisch städtische Praktik ist der Umgang der einander fremden Bewohner, die sich im öffentlichen Raum begegnen (Antweiler 2004: 286). Diese Praktiken bewegen sich in einem Kontinuum der Inszenierung von Individualität und der Gestaltung von Anonymität: Die Pluralität urbaner Lebensstile wird durch Techniken der Wahrung sozialer Distanz erst ermöglicht und für das einzelne Individuum ertragbar.

Überdies sind Städte ihrerseits in kleinere Einheiten gegliedert. Zumindest in Großstädten ist es so, dass die dortigen Bewohner meist nicht die gesamte Stadt, sondern lediglich einzelne Viertel näher kennen, zwischen denen sie sich bewegen und in denen sich ihr alltägliches Leben abspielt.<sup>6</sup> Doch nicht nur deshalb bieten sich Quartiere als Untersuchungsorte an. Sie sind konkrete Orte im Stadtgebiet, in denen sich gesellschaftliche Prozesse auf einer mittleren Ebene beobachten und verstehen lassen (Frey 2012: 509).<sup>7</sup> Wenn man davon ausgeht, dass das Quartier in vielerlei Hinsicht eine Stadt im Kleinen ist, lassen sich die meisten der oben genannten stadtbezogenen Begriffsbestimmungen auf das Quartier übertragen. Quartiere sind wie Städte »durch gebaute, natürliche, soziale und symbolische Strukturen gekennzeichnet sowie in einen übergreifenden historischen Zusammenhang eingebettet« (Steinführer 2002: 3). Anders als die Stadt sind Quartiere für die Akteure jedoch räumlich überschaubarer und kleinteiliger – und damit lebensweltlich »greifbarer« (Schnur 2012). Die Identifikation mit dem eigenen Quartier oder »Kiez« kann dabei weit größer sein als die Identifikation mit der gesamten

6 In Anlehnung an Steinführer (2002: 3) verwenden wir die Begriffe des (Wohn-)Viertels, des (Wohn-)Quartiers und des Stadtteils synonym.

7 Nicht die Stadt als Ganze, sondern das exotische Viertel bildete dann auch den primären Forschungsgegenstand der Chicagoer Schule (Lindner 2007). Von dort gingen entscheidende Impulse nicht nur für die Segregations-, sondern auch für die Nachbarschafts- und Quartiersforschung aus. Einen Sonder- und Extremfall urbaner Segregation stellen dabei Distrikte mit einem hohen Grad an sozio-kultureller und ethnischer Homogenität dar – wie »China Town« oder »German Village« in amerikanischen Großstädten.

Stadt. Auf der anderen Seite bietet die Großstadt in der Vielfalt ihrer Quartiere, Areale und Zonen die Möglichkeit, immer wieder auf Distanz gegenüber dem eigenen Viertel zu gehen. So ist das Verhältnis von »Kiez« und »Stadt« wohl am ehesten dialektisch zu begreifen: Man wohnt eben sowohl im Kiez als auch in der Stadt. Beides bedingt sich und verweist wechselseitig aufeinander.

Für die Stadt wie auch für ein einzelnes Quartier lässt sich demnach festhalten, dass es sich um ein baulich verdichtetes Gebiet handelt, in dem unterschiedliche soziale Gruppen leben, die spezifischen Regulationen unterliegen und bestimmte Formen von Praktiken pflegen. Städten werden zudem spezifische Bedeutungen zugeschrieben; gleichzeitig enthalten sie eine Vielzahl an Symbolen. Aus dem Zusammenspiel dieser Faktoren sowie dem historischen, politischen und sozioökonomischen Hintergrund ergibt sich die jeweilige Einzigartigkeit der Stadt (Desplat 2012: 29).

## 0.2.4 Religion

Die Vielfalt an Formen, in der religiöses Leben sich empirisch zeigt, spiegelt sich theoretisch in einer unübersehbaren Vielfalt an Definitionen und »wissenschaftliche[n] Imaginationen« (Riesebrodt 2007: 75) des Religionsbegriffs. *Funktionalistische Ansätze* verstehen Religion von bestimmten Aufgaben und Leistungen her, die für eine Gesellschaft bzw. für einzelne Individuen essenziell sind, wie beispielsweise die Bewältigung von Kontingenz (EKD-Text 2007: 34; Schulze 2009: 161), die Integration von Gruppen (EKD-Text 2007: 35) oder die Sinndeutung sozialer und personaler Identität (Zarnow 2014). Diejenigen Deutungsmuster und Sinnsysteme bzw. die »Sammlungen von Zeichen und Symbolen« (Waardenburg 1993: 30), die diese Leistungen erbringen, wären dann per definitionem als religiös zu bezeichnen. *Substanzielle Zugänge* hingegen definieren Religionen inhaltlich, etwa als Glauben an übermenschliche Mächte oder als Erfahrungen des Heiligen (Pollack 2012: 32–36). Sie nehmen darin für sich in Anspruch, eng den Selbstbeschreibungen gläubiger Menschen zu folgen. Wieder andere Ansätze *kombinieren* Gesichtspunkte aus beiden Zugängen. So versteht der Religionswissenschaftler Martin Riesebrodt Religionen als »Systeme von Praktiken« (Riesebrodt 2007: 13), die ihren genuinen Nutzen darin haben, »Unheil abzuwehren, Krisen zu bewältigen und Heilszustände herbeizuführen« (a.a.O.: 14). Im Begriff des Nutzens kann dabei ein Anschluss an funktionalistische Ansätze gesehen werden. Die inhaltliche Näherbestimmung dieses Nutzens gewinnt Riesebrodt dann allerdings nicht aus einer soziologischen Außensicht, sondern indem er der Binnenperspektive des religiösen Bewusstseins folgt; hierin besteht gewissermaßen ein Anschluss an den substanziellen Religionsbegriff. Religion zu erforschen, bedeutet in dieser Theorieeinstellung, die Selbstdeutung von Akteuren nachzuzeichnen, also gewissermaßen eine Deutungsarbeit in zweiter Potenz: Deutungen zu deuten. Die wissenschaftliche »Außenperspektive« realisiert sich als »Abstraktion und Systematisierung von Innenperspektiven« (a.a.O.: 109).<sup>8</sup>

8 Das Material, an dem sich der Sinn religiöser Praktiken ablesen lässt, sind die expliziten oder auch impliziten Theologien, Ethiken und Liturgien der Akteure, die ihrerseits in charakteristischer Weise auf überlieferte religiöse Traditionen Bezug nehmen.

Angesichts der Vielfalt an Phänomenen und möglichen Religionsdefinitionen gilt es auszuweisen, was in dieser Studie unter »Religion« verhandelt werden soll, um insbesondere die Bezüge zwischen Religion und urbanem Raum adressieren zu können. Drei Fragen sind dabei zu beantworten. Erstens: Welche raumbezogenen Phänomenbereiche sollen überhaupt in den Blick genommen werden, wenn nach Religion gesucht wird? Zweitens: Was soll innerhalb dieser Phänomenbereiche als religiös identifiziert bzw. empirisch erfasst werden? Drittens: Wie lässt sich das solcherart identifizierte religions-theoretisch rekonstruieren?

Zum ersten: In Anknüpfung an die Religionstheorie Martin Riesebrodts legt es sich zunächst nahe, Religion als Bündel sozialer Praktiken zu verstehen, die als habitualisierte, beobachtbare Prozesse in Raum und Zeit der empirischen Forschung zugänglich sind.<sup>9</sup> Doch auch Gebäude und Verwaltungsstrukturen, Regularien und Symbole, diskursive Tatbestände und soziale Organisationsformen können in unterschiedlichen Zusammenhängen als »religiös« adressiert werden. So wird in der vorliegenden Untersuchung entsprechend zu den verschiedenen Ebenen, auf denen der urbane Raum beschrieben wurde (siehe o.2.2), auch das Phänomen »Religion« multiperspektivisch in den Blick genommen. Dabei ist keineswegs ausgemacht, dass sich diese verschiedenen Adressierungen des Religiösen in einer übergreifenden Theorieperspektive bündeln lassen. Die Frage, ob den unterschiedlichen Erscheinungsformen urbaner Religion als symbolischer Kosmos, Bündel von Praktiken, diskursiver Tatbestand oder gesellschaftliche Sozialform ein einheitlicher und konsistenter Wesenskern zugrunde liegt, überschreitet jedenfalls die Anlage der vorliegenden Untersuchung. Im Folgenden wird nur angenommen, dass dasjenige, was sich im Raum der Stadt als Religion zeigt bzw. was hier von unterschiedlichen Akteuren als religiös adressiert wird, sich erst innerhalb eines multiperspektivischen Analyse Rahmens rekonstruieren lässt.

Da wir somit nicht mit einem vorab definierten Religionsbegriff ins Feld gehen, stellt sich, zweitens, die Folgefrage, was im Kontext der unterschiedlichen Phänomenbereiche nun überhaupt im engeren Sinn *als* Religion gelten soll. Auch hier schließen wir an Riesebrodt an und orientieren uns an der »inneren Sichtweise« der im Feld begegnenden Gruppen und Akteure. Methodisch leitend sind dabei ein pragmatischer Ausgangspunkt und eine Fortsetzungsregel. Den Ausgangspunkt nimmt die Studie bei den evangelisch-landeskirchlichen, römisch-katholischen und entsprechenden ökumenischen Akteuren und Aktivitäten vor Ort. Von ihnen aus nehmen wir weitere religiöse Phänomene mithilfe einer iterativen Fortsetzungsregel in den Blick: Was von einem religiösen Akteur – in kooperativer Nähe oder im Gestus der Konkurrenz bzw. der Ablehnung – als religiös benannt bzw. als »Seinesgleichen« oder signifikanter Anderer erkannt wird, soll als solches bzw. solcher gelten (Riesebrodt 2007: 43–74).<sup>10</sup> Damit ist nicht der Anspruch verbunden,

9 Die Praxistheorie, die »bisher keine abgeschlossene, durchsystematisierte Form gefunden« hat, versteht unter Praktiken die Vorstellung, dass diese »nichts anderes als Körperbewegungen darstellen und dass Praktiken in aller Regel einen Umgang von Menschen mit ›Dingen‹« sind (Reckwitz 2003: 289–290). Ausführliche Darstellungen der Praxistheorie finden sich in Reckwitz (2003) und Ortner (1994).

10 Was in diesem Sinne als Religion erkannt wird, wandelt sich historisch. Gerade in Städten haben es etwa die Kirchen gelernt, sich als ein Fall von Religion unter anderen religiösen Gruppierungen zu verstehen.

schließlich zu einer objektiven Lagebeschreibung von Religion im Raum des Quartiers zu kommen; skizziert wird vielmehr die religiöse Lage, wie sie sich aufgrund des gewählten Ausgangspunktes ergibt.<sup>11</sup>

Die dritte Frage ist, wie sich das solcherart empirisch vordergründig als religiös identifizierte schließlich *begreifen*, d.h. theoretisch rekonstruieren und auf unterschiedliche, etwa funktionalistische oder auch substanzielle Religionsdefinitionen zurückbeziehen lässt. Spätestens hier zeigt sich allerdings ein grundsätzliches hermeneutisches Problem. Weil Religion empirisch gleichsam nicht in »Reinform« vorkommt, sondern nur in Verbindung mit allerlei Profanem, stellen sich auf analytischer Ebene immer wieder neu die Fragen, was genau das »eigentlich« Religiöse am vordergründig als religiös Etikettierten ist, wo die Grenze zwischen Religion und Nicht-Religion verläuft und wie überhaupt mit der notorischen Mehrdeutigkeit der Empirie religionshermeneutisch intelligent umgegangen werden kann. All dies sind Fragen von erheblichem Gewicht, die daher auch nicht hier, am Ort der Einleitung und ersten begrifflichen Orientierung, sondern in einem eigenen Kapitel der Studie unter der Überschrift der *Hybridität* religiöser Phänomene näher beleuchtet werden sollen (siehe Kapitel 3).

## 0.2.5 Religiöse Topographie der Stadt

Wie lassen sich die Prozesse und Strukturen, durch die sich Religion innerhalb von neuen Stadtquartieren verräumlicht, auf empirisch gehaltvolle Weise erforschen? Es hat sich gezeigt, dass sich schon der urbane Raum selbst auf verschiedene Weise adressieren lässt. Er ist beschreibbar als materieller (insbesondere: gebauter) Raum, als sozialer Interaktionsraum, als Raum diskursiver Zuschreibungspraktiken, als politische Verwaltungseinheit, als lebensweltliche Bühne, als öffentlicher und privater Raum usw. (Guelf 2010). Jede dieser Beschreibungsperspektiven auf den städtischen Raum eröffnet auch eine eigene Sicht auf das Thema der Religion: Religion manifestiert sich im Raum der Stadt in Gestalt von *Bauten* wie Kirchengebäuden, Gemeindehäusern, Diakoniestationen, konfessionellen Kindertagesstätten, Familienbildungszentren, Friedhöfen usw. Der religiöse Raum lässt sich aber auch als *Verwaltungseinheit* (Parochie, Stadtdekanat) beschreiben, die sich territorial mit städtischen Verwaltungseinheiten (Bezirk, Kommune) überlagert und in Austausch befindet. Auf wieder anderer Ebene ist der religiöse Raum als *Sozialraum* beschreibbar, der in bestimmten städtischen Milieus verwurzelt ist. Im Zuge des *spatial turn* liegt der Blick darüber hinaus besonders auf der Analyse von *Praktiken*, durch die religiöse Räume ausgehandelt bzw. überhaupt erst hergestellt werden (*spacing*).

---

11 An dieser Stelle ist zu berücksichtigen, dass der öffentliche Status einer Religion in vielen Ländern durch die staatliche Anerkennung als Religionsgesellschaft bestimmt ist, welche die Sichtbarkeit religiöser Gemeinschaften und damit auch die Wahrnehmung der Forschenden beeinflusst (Becci, Burchhardt, Casanova 2013: 12). Zwischen den großen Religionen wie Christentum, Judentum, Islam, Buddhismus oder Hinduismus, philosophischen Weltanschauungen, spirituellen Angeboten und Aktivitäten aus den Bereichen Beratung, Psychologie und Wellness lassen sich wiederum keine materialen Abgrenzungen ziehen, die sich nicht ihrerseits der Binnenperspektive der jeweiligen Akteure verdanken.

Als Inbegriff des durch diese Vielfalt möglicher Beschreibungsebenen aufgespannten Relationsgefüges zwischen Religion und Raum dient im Folgenden der Begriff der *religiösen Topographie*. Er soll auf das Gesamt der Arten und Weisen verweisen, auf die Religion innerhalb der Stadt bzw. eines Stadtquartiers Raum greift.<sup>12</sup> Unterschiedliche Ebenen der religiösen Topographie eines Stadtquartiers können entlang der dargelegten Beschreibungsebenen des urbanen Raums differenziert werden. Entsprechend lassen sich religiöse Gemeinschaften und Stadtquartiere auf *materieller Ebene* in Beziehung setzen und beispielsweise daraufhin untersuchen, ob eine große Straße durch das Gebiet einer Gemeinde diese in zwei Hälften trennt. Auf *sozialer Betrachtungsebene* lässt sich fragen, welche Gruppen oder Milieus Zugang zu religiösen Gemeinschaften finden und welche anderen exkludiert bleiben. Auf der *Diskursebene* ist von Interesse, inwieweit religiöse Topoi öffentlich ventiliert sowie umgekehrt im Binnendiskurs der religiösen Gemeinschaften explizite Stadtteilthemen aufgegriffen werden. In der Analyse der *symbolischen Ebene* rücken bedeutungsvoll aufgeladene Verweiszusammenhänge in den Vordergrund. So greifen religiöse Gemeinschaften beispielsweise in ihrer Namensgebung städtische Begriffe auf. Als Beispiel seien die Namen von Moscheevereinen in Hamburg und Berlin genannt, die »in erster Linie an ihrer städtischen Lage orientiert sind: u. a. ›Neukölln Camii‹, ›Tegel Selimiye‹« (Färber, Spielhaus, Binder 2012: 72). Auf *administrativ-politischer Ebene* lässt sich beobachten, wie sich die unterschiedlichen Regelungen und Verwaltungsvollzüge der Stadt und der religiösen Gemeinschaften aufeinander beziehen. Setzt man schließlich städtische und religiöse *Praktiken* in Beziehung zueinander, lässt sich fragen, inwieweit sich diese ineinander verschränken oder aber berührungslos nebeneinanderstehen.

Die religiöse Topographie umfasst also vielfältige Dimensionen der Konfigurationen, in denen Religion dem urbanen Raum eingeschrieben ist. Diese komplexe Topographie lässt sich daher auch selbst nicht noch einmal räumlich in Form einer einfachen Karte abbilden. Sie ergibt sich vielmehr erst durch das Übereinanderlegen verschiedener Karten – ähnlich wie in einem Atlas, der physikalische, historische oder politische Landkarten beinhaltet. In einem engeren Sinn verwenden wir den Begriff der religiösen Topographie daher für die Darstellung signifikanter Orts- und Raumbezüge einzelner religiöser Akteure. Ausgehend von der Perspektive der evangelischen und katholischen Gemeinden – entsprechend des in Abschnitt 0.2.4 genannten Ausgangspunktes und der Fortsetzungsregel – kommen zunächst die von ihnen benannten religiösen Orte, Akteure, Gruppen und Gemeinschaften in den Blick. Im weiteren Sinn verweist der Begriff der religiösen Topographie auf das Gesamt des Beziehungsgefüges zwischen urbanem Raum und Religion.

Die skizzierten Ebenen fungieren als *Forschungsheuristik*, die der empirischen Untersuchung der einzelnen Quartiere, deren Ergebnisse im Folgenden dargestellt werden, zugrunde liegt. Entwickelt wurde die Heuristik in Bezug auf erste empirische Beobachtungen aus den Quartieren sowie im konstruktiven Anschluss an die urbanis-

12 Der Begriff ist im vorliegenden Zusammenhang inspiriert durch den Titel von Becci, Burchhardt, Casanova 2013: *Topographies of Faith*.



tischen Theoriemodelle, die oben (o.2.2) angeführt sind.<sup>13</sup> Im Endeffekt unterschieden wir *sechs Ebenen der Beschreibung und Analyse religiöser Topographien in neuen Stadtquartieren*: eine materielle, eine politisch-administrative, eine soziale, eine symbolische, eine diskursive Ebene und eine Ebene der Praktiken.

*Tabelle 1: Heuristik der sechs Bezugsebenen von Religion und Raum, dazugehörige Beispielfragen und Auswahl an Referenzmethoden*

| <i>Bezugsebene zwischen Religion und Raum</i> | <i>Beispielhafte Fragestellungen</i>                                                                                                                          | <i>Ausgewählte Referenzmethoden</i>                                                                         |
|-----------------------------------------------|---------------------------------------------------------------------------------------------------------------------------------------------------------------|-------------------------------------------------------------------------------------------------------------|
| materiell                                     | Wie ist ein religiöser Ort (Kirche, Moschee, Gemeindezentrum; aber auch: Kindertagesstätte, Diakoniestation, Weltladen) in das städtische Umfeld eingebettet? | Auswertung von Karten des Stadtteils, Auswertung von Fotos, Beschreibungen von Gebäuden und Raumatmosphären |
| politisch-administrativ                       | Wie sind Religionsgemeinschaften in die Planung neuer Stadtteile eingebunden?<br>Welchen Blick haben Stadtplanende auf Religion?                              | teilnehmende Beobachtungen bei Sitzungen, Auswertung von Archivmaterialien, Auswertung von Statistiken      |
| sozial(-strukturell)                          | Durch welche Sozialstrukturen ist ein Stadtteil geprägt?<br>Wie bilden sich städtische Milieus und Milieugrenzen in religiösen Gruppierungen ab?              | Auswertung kommunaler und kirchlicher Statistiken und vergleichbarer Daten                                  |
| symbolisch                                    | Nehmen die Religionsgemeinschaften im Namen oder Logo Bezug auf das Quartier?<br>Welche Geschichten und ›Mythen‹ werden über das Quartier erzählt?            | semi-strukturierte Interviews, Auswertung von Archivmaterialien, Auswertung von Fotos                       |
| diskursiv                                     | In welchen (lokalen) Medien wird auf Religionsgemeinschaften Bezug genommen?<br>Welche Rolle spielen religiöse Orte für die Identität des Quartiers?          | Diskursanalyse (lokaler) Medien, semi-strukturierte Interviews                                              |
| praktisch                                     | Durch welche Praktiken (Prozessionen, Kunstaktionen etc.) werden Religion und Raum verbunden?                                                                 | teilnehmende Beobachtungen, semi-strukturierte Interviews                                                   |

Diese Ebenen sind keineswegs trennscharf voneinander abzugrenzen. Aber ihre Unterscheidung erlaubt es, erstens die verwendeten Begriffe gezielt zu präzisieren, zweitens die Rede von der Beziehung zwischen städtischem Raum und Religion nach

13 Neben den dort erwähnten Konzepten Henri Lefebvres und Dieter Lämples entwickelt auch Walter Siebel ein mehrdimensionales Modell des urbanen Raums (Siebel 2012: 207).

Aspekten zu differenzieren sowie drittens die Auswahl einzelner Forschungsmethoden zu plausibilisieren. Tabelle 1 zeigt die genannten Ebenen und ordnet ihnen beispielhafte Fragestellungen und ausgewählte Referenzmethoden zu.

Die verschiedenen Ebenen der Heuristik erfordern mithin je spezifische Methoden der qualitativen Sozialforschung, die im Folgenden näher dargestellt werden. Insgesamt entsteht so ein qualitatives *Mixed-Method-Design*. Der Vorteil eines solchen Ansatzes ist es, dass sich durch die Verbindung »von dichten Beschreibungen mit der analytisch-vergleichenden Sicht und der Innensicht der Menschen« ein umfassender Einblick in das Forschungsfeld ergibt (Antweiler 2004: 300). Durch die Kombination mit einigen quantitativen Daten wie beispielsweise Mitgliederzahlen und Gründungsdaten wird darüber hinaus der größere soziographische und historische Kontext mit einbezogen.

### 0.3 Die Untersuchung der Quartiere

Im Folgenden werden ein Einblick in die Zeitstruktur des Projekts sowie ein Überblick über die untersuchten Quartiere geboten (0.3.1) sowie die Generierung (0.3.2) und Interpretation der Forschungsdaten (0.3.3) dargestellt.

#### 0.3.1 Zeiten und Orte

Die Datenerhebung erfolgte hauptsächlich im Zeitraum von Frühjahr 2017 bis Herbst 2018. In diesem Zeitraum wurden insgesamt neun Quartiere in Hamburg, Berlin und München erforscht. Neben diesen neu untersuchten Quartieren aus der Hauptphase fließen Ergebnisse der Pilotstudie des Projekts in die vorliegende Darstellung ein (Thiesbonenkamp-Maag, Moos, Zarnow 2017). Diese hatte Quartiere in den Städten Heidelberg, Karlsruhe und Freiburg zum Gegenstand; die Daten wurden zwischen Frühjahr 2015 und Herbst 2016 erhoben. Auswertungsworkshops vor Ort, die der kommunikativen Validierung und weiteren Datengenerierung dienten, fanden bis Oktober 2019 statt. Das Gesamtmaterial an Forschungsdaten, das in der Auswertung Berücksichtigung fand, umfasste Beobachtungen aus insgesamt sechs Städten bzw. 13 Quartieren (siehe Tabelle 2).

Die Auswahl der Quartiere beschränkte sich auf Stadtquartiere, die von Seiten der jeweiligen Stadtverwaltung beziehungsweise -politik ausdrücklich Gegenstand städtebaulicher Entwicklungsprogramme sind oder waren. Dabei wurde darauf geachtet, Quartiere unterschiedlichen Charakters und unterschiedlicher Entwicklungsphasen einzubeziehen. Die Auswahl der Quartiere richtete sich auch nach dem Umfang der Forschungsgelder, die in einer Region erhoben werden konnten. Von daher, aber auch schon aufgrund der Zahl der Quartiere und der Art des Zugangs, ist die Studie in keiner Weise repräsentativ. Ihre Aussagekraft besteht in der Beschreibung und Analyse der aufgefundenen Phänomene. Dabei gilt zu beachten, dass »zur Untersuchung eines Phänomens [wenige] Fälle oft aussagekräftiger sind als der Einsatz einer Methode an vielen Fällen« (Flick 2000: 260). Zu beurteilen, inwieweit die Ergebnisse sich auf andere Quartiere übertragen lassen, muss den Lesenden überlassen bleiben.

*Tabelle 2: Überblick über die untersuchten Stadtquartiere*

| <i>Pilotphase</i>           | <i>Hauptphase</i>              |
|-----------------------------|--------------------------------|
| Bahnstadt (Heidelberg)      | Hafencity (Hamburg)            |
| Heidelberg Süd (Heidelberg) | Hammerbrook (Hamburg)          |
| Südstadt (Karlsruhe)        | Billstedt-Horn (Hamburg)       |
| Vauban (Freiburg)           | Mitte Altona (Hamburg)         |
|                             | Agfa-Gelände Giesing (München) |
|                             | Neuperlach (München)           |
|                             | Freiham (München)              |
|                             | Rummelsburger Bucht (Berlin)   |
|                             | Blankenburger Süden (Berlin)   |

In der vorliegenden Studie wurde der Hauptteil der Daten im christlich-religiösen Kontext erhoben. Das hat zunächst seine Ursache darin, dass die christlichen Kirchen in den untersuchten Gebieten nach wie vor demographisch wie ressourcenmäßig von dominierender Präsenz sind. Es wurden aber auch Daten aus dem Bereich anderer Religionsgemeinschaften erfasst. Durch die Einbeziehung von Redakteurinnen, Architekten oder für ihr Stadtteil engagierten Bürgerinnen war darüber hinaus teils explizit, teils implizit die Stimme der Konfessionslosen und Säkularen präsent.

Durch den kontrastierenden Vergleich der verschiedenen Quartiere und ihrer entstehenden religiösen Topographien konnten Gemeinsamkeiten ebenso wie signifikante Unterschiede herausgearbeitet werden. Dabei galt es einerseits, den lokalen Eigentümlichkeiten gerecht zu werden und andererseits, Querschnittsthemen zu erkennen und auszuwerten. Die Kapitel des vorliegenden Bandes sind nach Querschnittsthemen gegliedert, beinhalten aber jeweils die Beschreibung eines einzelnen Quartiers, an dessen Beispiel das Thema zunächst entwickelt wird.

### 0.3.2 Methoden

Die Auswahl der Methoden der Datengewinnung orientierte sich an der Forschungsheuristik (siehe 0.2.5) zum einen, am Entwicklungsstand und an der situativen Gegebenheit des jeweils untersuchten Gebiets zum anderen. Da das Hauptaugenmerk der Studie – dem Thema Religion (siehe 0.2.4) angemessen – auf der Rekonstruktion des Selbstverständnisses, der Sinnwelten und Praxiskontexte lokaler Akteure liegt, werden vorrangig subjektzentrierte Methoden verstehender Sozialforschung wie Interviews und teilnehmende Beobachtung eingesetzt (Glaser und Strauss 1967; Spradley 1979; Flick 1991; Mayring 2002; Beer 2008).

Pro Quartier waren drei Monate Forschungszeit angesetzt. Diese Forschungszeit gliederte sich wie folgt: Nach einer Recherche und Sondierung von Gesprächspartner:innen erfolgte eine Feldbegehung einschließlich erster Tiefeninterviews. Ziel dieser ersten Begehung war es insbesondere, Hinweise auf weitere potenzielle Interviewpartner:innen und für den Stadtteil wichtige Termine zu erhalten (Stadtteilstefte, Umzüge, wichtige Gremiensitzungen, Jubiläen usw.). Nach einer Sichtung des so generierten Materials erfolgten mehrere weitere Begehungen, teilnehmende Beobachtungen und (Stegreif-)Interviews. Das sich so stetig anreichernde Material wurde auf mehreren

Interpretationsworkshops der Forschungsgruppe gesichtet und analysiert. In einer Vertiefungsphase wurden dann noch einmal gezielt einzelne Themenfelder fokussiert, die sich für das Quartier im Horizont der vorliegenden Fragestellung als besonders einschlägig herauskristallisierten. Mit einem solcherart geschärften Blick wurden weitere Daten erhoben. Auch wurden Daten auf Workshops generiert, die zu Beginn und zum Ende der Forschungszeit in den beteiligten Städten mit Vertreter:innen der evangelischen Landeskirchen und weiteren Interessierten durchgeführt wurden.

Zu den qualitativen Methoden, die in jedem Stadtteil zur Anwendung kamen, zählen Beobachtung und teilnehmende Beobachtung, Go-Alongs, Fotografie und vor allem das semi-strukturierte Interview. Weiterhin wurden punktuell Artikel aus (Stadtteil-)Zeitungen, Sitzungsprotokolle städtischer und kirchlicher Gremien sowie Webseiten ausgewertet. Die einzelnen Methoden wurden schon aufgrund der begrenzten Ressourcen des Projekts niemals ›flächendeckend‹ angewandt, sondern je nach sich herauskristallisierenden Forschungsgegenständen spezifisch eingesetzt und triangulierend aufeinander bezogen.

Grundlage für die Analyse waren qualitative Interviews mit Akteuren aus einem Quartier, die aufgezeichnet und anschließend transkribiert wurden. Die Fragen der semi-strukturierten Interviews betrafen alle sechs dieser Studie zu Grunde gelegten Bezugsebenen zwischen Religion und Raum. Die Dauer der Interviews betrug in der Regel dreißig Minuten bis zwei Stunden; das Rohmaterial an Aufzeichnungen umfasste pro Quartier ca. 20–30 Stunden. Zu den Interviewpartnern zählten religiöse Akteure: Pfarrerinnen und Pfarrer sowie Vertreter anderer religiösen Gemeinschaften, Mitglieder der Ältestenkreise und Ehrenamtliche, Vertreter der Stadtteilvereine sowie Mitarbeitende der Stadt wie beispielsweise Stadtplanerinnen.

Die Daten wurden pseudonymisiert, so dass ein Rückschluss auf die Identität der Personen erschwert ist. Allerdings handelt es sich in einer Reihe von Fällen um öffentliche Personen, etwa um kirchliche Leitungsverantwortliche. Auch ihre Namen wurden im vorliegenden Bericht geändert, wiewohl hier eine robuste Pseudonymisierung (im Sinne einer Zuordenbarkeit nur unter unverhältnismäßigem Aufwand) nicht möglich ist. Dies war den Beteiligten bereits bei der Aufnahme der Interviews bewusst. Die Interviewausschnitte, die im Folgenden wiedergegeben werden, sind um ihrer Lesbarkeit willen moderat geglättet worden. Auslassungen und Einfügungen durch die Autor:innen dieser Studie sind durch eckige Klammern markiert.

Pro Quartier wurden zwei bis drei Personen in strukturierten Interviews befragt. Mit einigen wurde wiederholt gesprochen – teils in ausgewiesenen Interviewsituationen, teils in offenen Gesprächen, in denen auch über den Fortgang der Thesenentwicklung diskutiert wurde. Dabei handelt es sich um eine Form der kommunikativen Validierung in einem dialogischen Forschungsprozess (Helfferich 2005: 155). Hinzu kamen pro Quartier etwa 10–15 Stegreifinterviews mit der Bewohnerschaft auf Stadtteilstesten, auf Spielplätzen, auf der Straße und in Geschäften oder bei Stadtteilbegehungen mit zufällig angetroffenen Besuchern der religiösen Einrichtungen. Diese Stegreifinterviews wurden in einem Feldtagebuch festgehalten, das ebenfalls in den Prozess der Datenauswertung einbezogen wurde.

Ein weiterer methodischer Zugang bestand in teilnehmenden Beobachtungen sozialer Interaktionen bzw. Praktiken. Er zielte unter anderem darauf ab, die Perspektiven

und Selbstrepräsentationen der beobachteten Personen in unterschiedlichsten Situationen nachzuvollziehen und Daten zu erheben, die vermittels von Interviews nicht primär zugänglich sind. So konnten Verschränkungen zwischen den verschiedenen Bezugssebenen von Religion und Raum, vor allem zwischen der materiellen, der sozialen, der symbolischen und der praktischen Ebene adressiert werden. Die teilnehmenden Beobachtungen dauerten zwei bis sechs Stunden. Sie bezogen sich auf eine Vielzahl an Aktivitäten, wie beispielsweise Stadtteilstefte, Stadtführungen, Gremiensitzungen, Andachten und Gottesdienste, Flohmärkte und Laternenenumzüge.

Zur ethnografischen Raumanalyse gehörten in jedem Quartier zudem wiederholte intensive Wahrnehmungsspaziergänge sowie Stadtteilbegehungen gemeinsam mit Forschungsteilnehmenden (*Go alongs*), mit deren Hilfe die Perspektive der Akteure erfasst werden konnte (Kusenbach 2008: 349). Über Wahrnehmungsspaziergänge »lassen sich auch Merkmale des Ambientes (klimatische Bedingungen, Geräusche, Gerüche) und unsichtbare strukturierende Raumelemente (Knotenpunkte, Grenzen, Zonen) erfassen« (Huffschnid, Wildner 2009). Diese wurden ergänzt durch Fotografien etwa von permanenten Gebäuden oder temporären bzw. ephemeren Architekturen auf Stadtteilstefen, die zum Teil im Forschungsverlauf erstellt, teils auf Nachfrage von den Interviewpartner:innen überlassen und im Verlauf der Analyse den Aussagen der Gesprächspartner:innen ergänzend oder auch kontrastierend zur Seite gestellt wurden.<sup>14</sup>

Schließlich wurden punktuell Medien (Websites, Pressemitteilungen, Stadtteilzeitschriften etc.) und Archivmaterialien (Statistiken, Protokolle etc.) herangezogen. Ziel dieser Erhebung war es zum einen, allgemein zugängliche Hintergrundinformationen über die soziale Zusammensetzung der Wohnbevölkerung, den räumlichen Zuschnitt und das Selbstverständnis von religiösen Gemeinschaften, städtische Entwicklungsmaßnahmen oder Planungsvorhaben privater Investoren zu erfassen. Zum anderen fungierte insbesondere die Recherche von Archivmaterialien als eine eigene Datenquelle zur politisch-administrativen wie auch zur diskursiven Bezugsebene von Religion und Raum, die ergänzend neben die anderen Quellen trat.

Zur Veranschaulichung wurden Karten der Quartiere erzeugt, die zum Teil in diesem Band wiedergegeben sind. Sie sind unter Verwendung von OpenStreetMap-Daten von den wissenschaftlichen Hilfskräften Cedric Reif, Frederik Fuß und Lea Roth erstellt worden.<sup>15</sup>

### 0.3.3 Interpretation und Ergebnisdarstellung

Die verwendeten Methoden zielten darauf ab, einen – immer subjektiv gefärbten – Ausschnitt der Wirklichkeit dicht zu beschreiben (Geertz 1983). Ausgewertet wurden die erhobenen Daten in der Interpretationsgemeinschaft der Autor:innen dieses Bandes. Auf regelmäßigen Interpretationsworkshops während des gesamten Forschungszeitraums wurde das Datenmaterial aus den unterschiedlichen Quellen gesichtet, systema-

14 In den folgenden Kapiteln sind Ergebnisse von teilnehmenden Beobachtungen und Wahrnehmungsspaziergängen, die eine dezidierte Ich-Perspektive der Forscherin einnehmen, zur besseren Lesbarkeit kursiv gesetzt.

15 © OpenStreetMap-Mitwirkende; Stand zwischen Juni 2017 und September 2020.

tisiert und analysiert. Ein weiterer Teil wurde allein von Juliane Kanitz bearbeitet. In die Interpretationsschleifen wurden außerdem die Forschungspartner:innen selbst mit eingebunden. Auf einem Auftakt- und einem Abschlussworkshop pro Stadt wurde das Forschungsvorhaben bzw. wurden die vorläufigen Ergebnisse vorgestellt und diskutiert. Die Anregungen und Diskussionsergebnisse flossen in den weiteren Forschungsverlauf mit ein.

Die Auswertung der Daten wie auch die Erhebung derselben orientierten sich zunächst an der Methode der Grounded Theory (Glaser, Strauss 1967). Hier laufen Forschungsphasen (Datenerhebung und -analyse) und Theoriebildung parallel und bedingen sich wechselseitig – mit dem Ziel, eine gegenstands begründete Theorie zu entwickeln. Dazu gehört auch, dass begriffliche Konzepte wie ›Religion‹ dem generierten Datenmaterial nicht äußerlich bleiben, sondern – soweit möglich – aus dem Material selbst erschlossen werden. Auf diese Weise wurden insbesondere die Grundbegriffe der Studie selbst noch einmal modifiziert (siehe dazu insbesondere Kapitel 1–4). Darüber hinaus wurden einzelne sozial- und kulturwissenschaftlichen Theorien ins Spiel gebracht – allerdings erst nachrangig, sofern sie sich als nützlich erwiesen, das Material zu analysieren. Genauer betrachtet bestand ein hermeneutischer Zirkel zwischen solcher ›externer‹ Theorie und dem Material mitsamt den daraus induzierten moderaten Verallgemeinerungen: Theorierelevante Themen legten sich aufgrund der interpretativen Auswertung des Materials nahe. Daraufhin wurden geeignete Theorieversatzstücke aus der Stadtsoziologie, der Kulturwissenschaft, der Ethnologie, der praktischen Theologie und anderen Referenzdisziplinen herangezogen. Diese dienten wiederum als Heuristik der weiteren Wahrnehmung und Interpretation, als Strukturierungshilfe für die Analyse und schließlich auch dazu, die Beobachtungen am Material an bestehende theoretische Debatten um Religion und Stadt anzuschließen. Ob solche Theorieversatzstücke erschließungskräftig waren, hatte sich wiederum am Material zu bewähren. So präsentieren sich die einzelnen Kapitel der Studie im Endergebnis als eine Dreiheit aus quartiersspezifischen Beobachtungen, thematischem Fokus und theoretischer Kontextualisierung.

In der Regel wurde eine Auswertung im Sinne einer inhaltlich-strukturierenden qualitativen Inhaltsanalyse vorgenommen (Schreier 2012; 2014). Textstellen in Interviews und Forschungstagebüchern sowie weiteren Materialien wurden mit einem offenen System codiert, sodass verschiedene Passagen zu gleichen Themen anschließend zusammengestellt und gemeinsam interpretiert werden konnten. Dabei wurden vor allem induktive Codes verwendet und durch deduktive Codes aus den Ebenen der Heuristik und den untersuchungsleitenden Grundbegriffen ergänzt. Diese Codes wurden in zahlreichen Interpretationsschleifen immer weiter modifiziert, durch Bildung von Über- bzw. Unterkategorien differenziert und gegenseitig profiliert.

Das Interpretationsverfahren führte schließlich zu elf Leitthemen, denen jeweils ein Kapitel der folgenden Darstellung gewidmet ist. Sie stellen das zentrale Ergebnis der Studie dar. Diese Themen erheben keinen Anspruch auf Allgemeinheit, sind aber von stadtteilübergreifender Bedeutung. Jedes Thema wird zunächst anhand eines Stadtteils dargestellt, kommt aber nicht exklusiv in diesem vor, sondern lediglich in besonders prägnanter Weise. Zwischen den Themen besteht keine scharfe Trennung, aber sie implizieren doch jeweils einen neuen und anders ausgerichteten Fokus auf den Gegenstand der

Studie. Die Liste der Themen stellt ein offenes, prinzipiell erweiterungsfähiges Tableau ohne Anspruch auf Vollständigkeit dar. Dennoch zeichnen sie in ihrer Gesamtheit ein gutes Bild religiöser Topologien in neuen Stadtquartieren, wie es sich aufgrund der Studiendaten ergibt.

Jedes Thema wird zunächst anhand eines Quartiers eingeführt (n.2), dann aber anhand von Daten aus anderen Quartieren vertieft und systematisiert (n.3). Die Kapitel werden gerahmt durch eine theoretische Einführung, die die jeweils interpretationsrelevanten Theorieelemente fokussiert (n.1), und eine knappe, thesenartige Zusammenfassung (n.4). Die Reihenfolge der Kapitel ergibt eine narrative Logik, die im Schlussteil des Buches nachgezeichnet wird. Gleichwohl können die Kapitel auch einzeln und in abweichender Reihenfolge gelesen werden.

# 1. Zentralität

---

## 1.1 Zentralität als Merkmal städtischer Raumstruktur

Das Erscheinungsbild des städtischen Raums wird durch diverse Stilelemente geprägt: durch natürliche Fluchten, Barrieren und Grenzen, durch Schneisen, Straßen und Wege, durch auffällige Orte und Bauten, durch leere Flächen und verrufene Areale. All diese Elemente tragen zur Erscheinung des Raumes als einer gegliederten Größe bei und ermöglichen Orientierung in ihm. Die Lesbarkeit der Stadt ist vermittelt durch eine Vielzahl räumlicher Markierungen, die sich insgesamt zu einem Stadtbild fügen. Die inneren Landkarten – die *mental maps* – der Bewohner:innen repräsentieren und variieren dieses Bild auf vielfältige Weise (Lynch 1975). Im Zusammenspiel von äußeren Gliederungselementen und standpunktbezogen-konstruktivem Zugriff erscheint der Raum der Stadt als bedeutungsvolles Ordnungsgefüge, das den Hintergrund der Alltagsroutinen seiner Bewohnerinnen darstellt.<sup>1</sup>

Eine besondere Bedeutung kommt dabei der Ausrichtung der Raumstruktur auf ein Zentrum (bzw. mehrere Zentren) zu. Die »Unterscheidung von Zentrum und Peripherie [...] bzw. Mitte und Rand« gehört zu den »hervorstechende[n] Merkmal[en] der europäischen Stadt« (Schroer 2012: 241). Beide Begriffe sind mit mehrdeutigen, teils normativen Bedeutungen beladen: Was »randständig« ist, erscheint eben von »peripherer« Bedeutung, während das, was als »zentral« gilt, hohe Relevanz für sich beansprucht. Die Unterscheidung von Zentrum und Peripherie ist damit mehr als eine bloß geographische: In sie sind zugleich soziale und kulturelle Aspekte eingelagert. Randständige soziale Gruppen wohnen nicht nur in der urbanen Peripherie; sie bewegen sich auch außerhalb der gesellschaftlichen Norm: »Die Randständigkeit transportiert Teilnahmslosigkeit und Ausgeschlossenheit und steht damit diametral dem Ideal des aktiven Stadtbürgers entgegen« (Schroer 2012: 242). Der Peripherie (genauer: den vielen Peripherien) steht das Zentrum gegenüber, wo Sehenswürdigkeiten versammelt sind, wo sich das Le-

---

1 Zur Räumlichkeit als Existenzialstruktur des menschlichen Daseins vgl. Bollnow 2010.



ben verdichtet und wo Macht präsentiert wird.<sup>2</sup> »Zentral« meint mithin zugleich eine topographische Lagebestimmtheit und eine Verdichtung von Bedeutsamkeit. Wer oder was im Zentrum liegt, ist von herausragendem Gewicht für das Ganze.<sup>3</sup>

Gegenwärtige Tendenzen der Stadtentwicklung können allerdings so interpretiert werden, dass die Unterscheidung von Zentrum und Peripherie an Eindeutigkeit verliert. Thomas Sieverts hat in diesem Zusammenhang den Begriff der »Zwischenstadt« geprägt. Damit gemeint »ist die Stadt zwischen den alten historischen Stadtkernen und der offenen Landschaft, zwischen dem Ort als Lebensraum und den Nicht-Orten der Raumüberwindung, zwischen den kleinen örtlichen Wirtschaftskreisläufen und der Abhängigkeit vom Weltmarkt« (Sieverts 2013: 7).

Gerade auch für neue Stadtquartiere gestaltet sich die Suche nach der Mitte oft als prekär: Es gibt kein gewachsenes Zentrum, die städtebauliche Mitte bleibt leer, wird verbaut oder mit einem Provisorium gestaltet. Hier zeigt sich in extremer Form, was sich auch andersorts beobachten lässt: ein »Abbau räumlicher Zentralitätshierarchien zugunsten einer [...] raumfunktionalen Spezialisierung« (Sieverts 2013: 38f). Wieviel Zentrum überhaupt gebraucht bzw. gewünscht wird, kann zum Gegenstand kontroverser Auseinandersetzungen werden. Der Zwischenstadt korrespondiert dabei »ein Wechsel im Verhältnis zwischen BürgerInnen und Stadt. Die Bewohner der Zwischenstadt sind nicht mehr die von Max Weber beschriebenen Bourgeois und Citoyens [...] Die Beziehung der Zwischenstädtler [...] zur alten Stadt kam am besten mit dem Schlagwort »To Have the City, but Not to Be the City« beschrieben werden« (Löw, Steets, Stoetzer 2008: 112).

Die Schleifung des Gegensatzes von Zentrum und Peripherie lässt sich unterschiedlich bewerten: als Verlust an alteuropäischer Urbanität oder auch als Transformationsgeschehen, das »neue Gestaltungsperspektiven eröffnet« (Sieverts 2013: 9). Aus Perspektive der Bewohner ist das keine abstrakte Theoriedebatte, sondern eine Frage der alltäglichen Lebensqualität: Wohin fahre ich, wenn ich ins Zentrum fahre – und wie weit bin ich davon entfernt?

Auch und insbesondere für die Religionsthematik ist die Frage nach dem Zentrum von hoher Relevanz – und zwar sowohl in räumlicher als auch in symbolischer Hinsicht. Denn Religionen definieren sich *per definitionem* durch den Anspruch, auf zentrale Aspekte des menschlichen Lebens bezogen zu sein. So sind die Kernaussagen der christlichen Glaubenslehre dadurch charakterisiert, dass sie die Individuen nicht peripher bzw. nur in einer bestimmten, randständigen Hinsicht, sondern »als solche« (Wagner 1995: 63), das heißt wesentlich und umfassend adressieren und so gleichsam auf die symbolische Mitte des Lebens zielen. In der christlichen Kulturgeschichte wurde dieser Anspruch auf eine zentrale Bedeutung der Religion für das Leben räumlich im Idealbild der alteuropäischen Stadt verwirklicht. Die Wichtigkeit des Glaubens zeigte sich in der zentralen Lage repräsentativer Kirchen, oft eingebunden in die Trias von Rathaus, Marktplatz und

2 Allerdings ist zu betonen: Zentralität im angedeuteten normativen Sinn muss nicht identisch sein mit der »City«. Letztere kann vielmehr selbst veröden und zu einem Fluchtpunkt »randständiger« Existenz werden (Moos, Zarnow 2022).

3 Diese Konnotationen der Unterscheidung von Zentralität und Peripherie gelten, wie gesagt, insbesondere für die europäische, durch das Christentum geprägte Stadt. Zu den ideen- und kulturgeschichtlichen Hintergründen vgl. Sennett 2011.

Kirchturm (Heigl 2008: 227). Bedeutsame Lebensdimensionen (Macht, Handel, religiöser Glaube) wurden entsprechend räumlich versinnbildlicht. Gegenüber dieser symbolträchtigen Konstellation hat sich das heutige Erscheinungsbild städtischer Zentren stark gewandelt. Mit dem gesellschaftlichen Relevanzverlust kirchlich institutionalisierter Religion verflüchtigt sich auch die Selbstverständlichkeit ihrer stadträumlichen Zentralpräsenz. Das Zentrum und seine Symbolik verstehen sich auch und gerade in religiöser Hinsicht nicht mehr von selbst.

Aber die Stadt ist eben mehr als ihr Zentrum, und auch die urbane Religionskultur ist räumlich differenziert zu betrachten. Neben der Citykirche gibt es die Vorstadtgemeinde, neben dem Kulturgottesdienst im urbanen Sakralbau den Hauskreis im heimischen Wohnzimmer. Unterschiedliche Formen religiöser Vergemeinschaftung gehen mit verschiedenen Formen der Nutzung von Kirchengebäuden und Gemeindehäusern einher (Hermelink 2017). Religiöse Praktiken suchen und schaffen sich ihre Räume, wie das vorhandene Raumangebot umgekehrt die religiöse Praxis präfiguriert. Somit ist Religion auch unter geänderten städtischen Bedingungen integraler Bestandteil der urbanen Raumordnung. Der unter dem Begriff der Säkularisierung verhandelte Tatbestand stellt (auch) einen Prozess der Pluralisierung und Differenzierung urbaner Präsenzformen des Religiösen dar.

Die Kernthese des vorliegenden Kapitels lautet, dass Religion an der Spannung von Zentralität und Peripherie partizipiert, die den urbanen Raum als solchen insgesamt kennzeichnet. In empirischer Hinsicht ist dabei von besonderem Interesse, wie es der Religion im Einzelnen gelingt, sich in neuen Stadtquartieren als Bestandteil einer bedeutsamen Raumordnung zu etablieren. Durch welche räumlichen Elemente wird ein neues Stadtquartier lesbar – und wie fügt sich Religion in diese stadträumliche Textur ein? Gibt es bereits ein Zentrum im neuen Quartier, zu dem sie sich ›verhalten‹ muss – oder wird sie selbst als Zentrumsanwärterin adressiert? Mit diesen Fragen soll zunächst das inzwischen über 50 Jahre alte Neubauquartier Neuperlach und seine religiöse Topographie in den Blick genommen werden. Hier lässt sich eine über die Zeit gewachsene Pluralisierung der Zentren beobachten (1.2). Im darauffolgenden Abschnitt werden die Beobachtungen aus München mit denen aus anderen Quartieren angereichert. Dabei wird näher beschrieben, wie sich Religion auf unterschiedliche Weise im Spannungsfeld von Zentralität und Randständigkeit positionieren kann (1.3). Ein Fazit schließt das Kapitel ab (1.4).

## 1.2 Zentralität als Problem in neuen Stadtquartieren

Im Folgenden soll zunächst, nach einer kurzen Einführung ins Quartier (1.2.1), Neuperlachs religiöse Topographie nachgezeichnet werden, die eine Staffelung von Zentren in mehrere Sub-Zentren und ihnen zugeordnete religiöse Zuständigkeitsbereiche aufweist (1.2.2). Im Anschluss daran wird dargelegt, inwiefern die Frage bzw. Suche nach dem Zentrum in Neuperlach ein drängendes Thema auch und gerade der religiösen Akteure ist (1.2.3). Dabei tritt ein Tableau von Themen in Erscheinung, das unter der Chiffre der Zentralität in neuen Stadtquartieren auch andernorts regelmäßig (mit-)verhandelt wird (1.2.4).

### 1.2.1 Neuperlach (München)

Auf der ›grünen Wiese‹ im Südosten Münchens wurde in den 1960er Jahren das Quartier Neuperlach errichtet, das heute zum Stadtbezirk Ramersdorf-Perlach, dem mit 118.000 Einwohner:innen bevölkerungsstärksten Münchens, gehört.<sup>4</sup> Das über 50 Jahre alte Quartier ist immer noch bzw. wieder Gegenstand städtebaulicher Entwicklungsmaßnahmen. So plant die Stadt München die Errichtung eines Stadtteilzentrums rund um den Hans-Seidel-Platz. Außerdem soll auf dem Gelände einer ehemaligen Kiesgrube ein neues Quartier mit ca. 1300 Wohnungen für 3000 Menschen errichtet werden. Hier sollen insgesamt 390 Wohnungen im geförderten Wohnungsbau entstehen.<sup>5</sup>

Neuperlach gehört zu einem der ältesten Bezirke, die in der vorliegenden Studie untersucht werden. Das heutige Viertel setzt sich zusammen aus fünf großzügig angelegten Gebieten, die in einzelnen Bauabschnitten errichtet wurden, was sich auch an unterschiedlichen Architekturstilen ablesen lässt.

»Im Verlauf von 25 Jahren entstanden hier in sieben Bauabschnitten 22.700 Wohnungen (darunter 46 Prozent öffentlich gefördert) für rund 55.000 Einwohner\*innen. Darüber hinaus wurden mit dem Krankenhaus Neuperlach, mehreren kleineren Einkaufszentren und einem großen Einkaufs- und Dienstleistungszentrum (PEP – Perlacher Einkaufspassagen) die erforderlichen Gemeinbedarfseinrichtungen eingerichtet. Ein neu geschaffenes Straßensystem sowie Bahnhöfe der S- und U-Bahn verbinden Neuperlach sowohl mit dem Stadtzentrum als auch mit der Region.«<sup>6</sup>

Die Wohnbebauung des Neubaugebietes besteht aus Geschosswohnungen, die in den 1960er Jahren geplant wurden und ihrerzeit als fortschrittlich und modern galten. Bereits in den 1970er Jahren wurden aber zunehmend kleinere Bauformen bevorzugt. Im Kontrast zu den Mietskasernen der 1920er Jahre, die zwar reich verzierte Fassaden hatten, aber dicht an dicht aneinandergesetzt wurden, war das erklärte Konzept, schlichte und vielstöckige, dafür aber hygienisch hochwertige und lichtdurchflutete Häuser zu bauen. Die Zimmeraufteilung sollte sich an den Himmelsrichtungen orientieren, also etwa die Wohnzimmer Richtung Abendsonne und die Schlafzimmer in Richtung Morgen Sonne ausgerichtet sein, was die teils scheinbar willkürlich angelegten Straßenzüge erklärt (Tamborino 2012). Eine Auflage der Münchner Stadtverwaltung war dabei, als Mindestabstand zwischen zwei Häusern die Summe ihrer Fassadenhöhe einzuhalten, um die Anlage großzügig zu gestalten. Um diese Maßgabe zu umgehen, finden sich in Neuperlach sogenannte »Balkonbrücken«. Sie bestehen aus einer Betonwand, welche benachbarte Häuser miteinander verbindet und an die, zur Gestaltung des Übergangs, Balkone angebaut wurden. Diese Balkonbrücken verbinden Häuser zu zusammenhängenden Häuserblöcken. Im Erdgeschoss wurden Durchgänge freigelassen; ein Merkmal, das in baugestalterischer Hinsicht einen eigentümlichen Eindruck hinterlässt.

4 Statistisches Taschenbuch München 2020: 121.

5 <https://www.muenchen.de/rathaus/Stadtverwaltung/Referat-fuer-Stadtplanung-und-Bauordnung/Projekte/Friedrich-Creuzer-Strasse.html>, abgerufen am 10.9.2020.

6 Statistisches Taschenbuch München 2020: 121.

Neuperlach wurde als Entlastungsstadt von dem »größte[n] und bedeutendste[n] nicht-staatliche[n] Wohnungsbaukonzern im Europa der Nachkriegszeit«,<sup>7</sup> der »Neuen Heimat«, geplant und durch dessen baulichen Maßnahmenkatalog geprägt.<sup>8</sup> Die »Neue Heimat« erarbeitete den Bebauungsplan mit seinen Straßenzügen, der Wohnbebauung sowie den Einkaufszentren. Einige der Bauabschnitte wurden allerdings nicht so ausgeführt, wie ursprünglich von den Architekten geplant. Ein Beispiel dafür ist der zentrale Wohnring. Entworfen von dem Architekten Bernt Lauterer, der den 1967 ausgeschriebenen Wettbewerb gewonnen hatte, sollte ein achteitiger Ring mit über 400 Meter Durchmesser eine große Freifläche begrenzen, in deren Mitte sich Ladenpassagen, Kirchen und kulturelle Einrichtungen befinden sollten. Außerdem galt als wichtiger Teil der Planung ein Bürgerhaus mit einer Volkshochschulaußenstelle sowie einer Stadtteilbibliothek. Allerdings überschneidet sich die bauliche Ausführung mit der Planung des Münchner Olympiaparks, wodurch die notwendigen finanziellen Ressourcen fehlten, das Projekt abzuschließen. Anstatt städtische Einrichtungen an einem zentralen Punkt funktional zu verschränken, wurde das Konzept zugunsten einer dezentralen Trennung von Wohnen, Sport, Kultur und Einkaufsmöglichkeiten aufgegeben (Tamborino 2012). Die ursprünglich komplexe Planung wurde schrittweise reduziert. Schließlich war für das Zentrum nur noch ein Bürgerhaus vorgesehen – allerdings wurde dieses bis heute nicht errichtet. Das Ergebnis ist eine zersiedelte Raumstruktur. Das Zentrum als ein das Viertel zusammenhaltender Ort verdichteter Urbanität fehlt bzw. ist baulich nicht ausgestaltet.

Die Bewohnerschaft Neuperlachs bestand zu Beginn einerseits aus Eigentümerinnen und andererseits aus Bewohnern des geförderten Wohnungsbaus. Über die Jahre kam es allerdings zu einer vermehrten Umwandlung von Sozialwohnungen in Eigentum, was ein gemeinsames Altern der Erstbewohner nach sich zog. Dieser Synchronisationseffekt wird allerdings von einer anderen Dynamik überlagert. Aufgrund der relativ niedrigen Mieten transformierte sich das Gebiet zu einem Bezirk mit einem hohen Anteil von Migrant:innen. Diese Entwicklung hatte eine teils stark negative Außenwirkung zur Folge:

»Naja, also der Ruf von Neuperlach ist nicht der beste, ich weiß nicht, jeder Münchener weiß, was Hasenberg! ist, und Neuperlach kommt direkt danach. Hat seinen Ruf als sozialer Brennpunkt schon auch aus früherer Zeit, vor allen Dingen 90er Jahren. Ist sehr vieles getan worden, ist sehr viel auch besser geworden, aber es ist, was so den Sozialstatus der meisten Leute hier betrifft, eher *low-level*, und überdurchschnittlich viel Migration.« (Schreiner, PE)

7 <https://www.architekturmuseum.de/ausstellungen/die-neue-heimat-1950-1986/>, abgerufen am 7.9.2019.

8 Das Ende der »Neuen Heimat« ist bekannt: Vorstandsmitglieder der gemeinnützigen Wohnungsbaugesellschaft wurden im Februar 1982 vom Magazin »Der Spiegel« der Vermögenshinterziehung beschuldigt. Die Affäre führte schließlich zur Abwicklung der »Neuen Heimat«. Die Wohnungsbaugesellschaft wurde durch die WBS ersetzt, die heute die meisten Wohnungen in Neuperlach besitzt.

Nachdem Neuperlach in den 1990ern in Verruf geraten war, wurden diverse städtebauliche Mittel ergriffen, um den Bezirk aufzuwerten. Durch hochpreisige Nachverdichtung und aufgrund der allgemeinen Preisentwicklung in München konnte nun wieder ein behutsamer Zuzug der Mittelschicht registriert werden. Eine deutlich merkbare Konsequenz aus der sozialstrukturellen Veränderung zeigt sich im Feld des ehrenamtlichen Engagements innerhalb von Kirche und Gemeinde. Waren früher viele Hausfrauen in Neuperlach mit zeitlichen Kapazitäten für ehrenamtliche Tätigkeiten ansässig, sind diese Kapazitäten aufgrund der zunehmenden Berufstätigkeit der Frauen stark zurückgegangen. So wird die soziale Transformation zu einem substanziellen Problem für die kirchlich-religiösen Akteure vor Ort:

»Wenn irgendwo Neubaugebiete sind, hier in München, das beobachte ich seit bestimmt 15 oder 20 Jahren, dann sagen immer die Gemeindepfarrer, wo das passiert: ›Oh toll (reibt sich die Hände), da kommen Neue.‹ Die kommen aber nicht, woran liegt denn das? Und Sie haben da einen Teil der Antwort auf alle Fälle, das ist durch die Verdrängung.« (Schreiner, PE)

Mit »Verdrängung« meint der evangelische Pfarrer in diesem Fall den Wandel der Bevölkerung, von deutschsprachiger Mittelschicht, auf welche die kirchlichen Angebote zugeschnitten sind, zu einer Bevölkerungsstruktur, die aufgrund von anderer Religionszugehörigkeit, von Sprachbarrieren, aber auch aufgrund anderer Lebensstile mit diesem Angebot nichts (mehr) anfangen kann.

## 1.2.2 Religiöse Pluralität als stadträumliche Polyzentralität

Über die Jahre hat sich eine hohe Dichte an religiösen Bauten vor allem der christlichen Kirchen in Neuperlach angesammelt. Im ehemaligen Neubaugebiet befinden sich mehrere Standorte der katholischen Kirche: die Kirchenpfarrei Christus Erlöser mit den Kirchenzentren St. Maximilian Kolbe, ferner die kirchlichen Standorte St. Stephan, St. Monika, St. Philipp Neri und die während der Forschungsphase geplante, inzwischen fertiggestellte Kapelle St. Jakobus. Weiterhin gibt es Standorte der evangelischen Kirche: die evangelisch-lutherische Lätare-Gemeinde mit der Lätare-Kirche und die Dietrich Bonhoeffer Kirche, ferner eine ökumenische Krankenhauskapelle, eine Präsenz der reformierten Kirchengemeinde, eine baptistische und eine weitere freikirchliche Gemeinde (Perlacher Herz), zwei Moscheen (Merkez-Moschee, Perlach Camii) und eine Serbisch-Orthodoxe Gemeinde.

In der geographischen Verteilung der religiösen Standorte spiegelt sich die Ausdifferenzierung des Gesamtgebietes von Neuperlach in mehrere kleinere Quartiere bzw. stadträumliche Sub-Zentren wie Perlach-Süd, -Ost, -West und -Nord. Dabei fällt auf, dass in mehreren dieser kleineren Quartiere jeweils zwei Gemeindezentren der katholischen und evangelischen Kirche nah beieinander liegen. Wie ist es zu dieser Doppelstruktur gekommen? Dieser Frage soll im folgenden Punkt nachgegangen werden (a). Daran anschließend werden die anderen genannten religiösen Akteure bzw. Orte kurz vorgestellt (b).

Abbildung 1: Übersicht über religiöse Standorte in Neuperlach

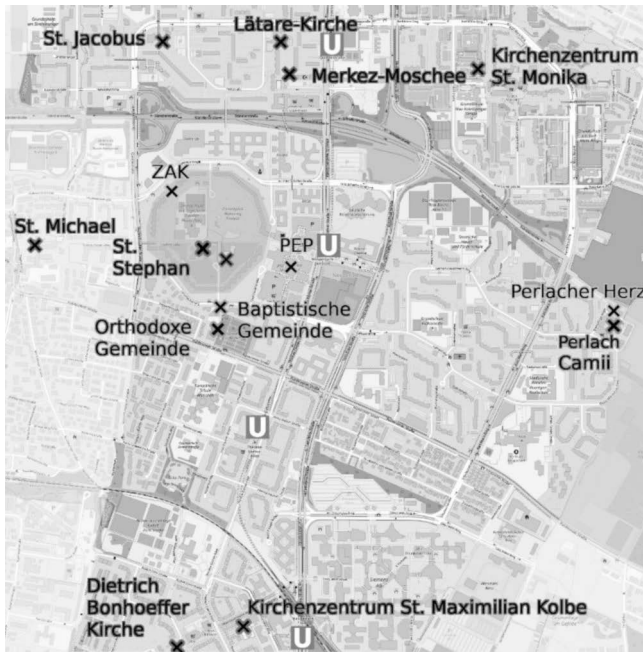

### a) Ökumenische Konkurrenzen

Beide christliche Landeskirchen, die evangelische und die katholische, hatten in dem neuen Quartier in der Gründungsphase Neuperlachs einen Neustart zu verzeichnen. Die katholische Kirche errichtete zunächst eine Behelfskirche in der Quiddestraße (St. Jakobus) und gewährte der evangelischen Gemeinde darin Gastrecht. Diese hatte bis zur Einweihung der Lätare-Kirche im Jahr 1971 keine eigenen Räumlichkeiten – ausgenommen zweier Pfarrwohnungen für den Diakon und den Pfarrer (Rupprecht 2011: 11). In der Folgezeit hat sich die konfessionelle Differenz von katholischer und evangelischer Kirche auch baulich ausgestaltet und führte zu einer ökumenischen Doppelstruktur der religiösen Topographie Neuperlachs:

»Das muss man dazu sagen, das ist konzipiert worden als eine ökumenische Achse. Da ist praktisch ein großer Platz [mit der evangelischen Dietrich-Bonhoeffer-Kirche] [...] und direkt gegenüber, wie ein Pendant, die katholische Kirche, Maximilian Kolbe. Das gehört zusammen. Eigentlich, das ist auch architektonisch so geplant, das sind so zwei Kirchen, die sich, nur durch einen Platz getrennt, gegenüberstehen.« (Schreiner, PE)

Ebenso waren die ehemalige evangelische Kapelle im Sudermannzentrum und Phillip Neri sowie das inzwischen geschlossene Sechseck im Perschelanger zusammen mit St. Monika paarig angeordnet. Diese durch ökumenische Konkurrenzen angeregte Pluralisierung kirchlicher Standorte erwies sich allerdings zunehmend als dysfunktional. Insbesondere auf der evangelischen Seite hat sich die Situation in den letzten Jahren massiv verschärft:

»Das große Problem, was wir hier haben: Die Gemeinde hatte mal fünf Gemeindezentren und jetzt haben wir noch zwei, und das ist immer noch eines zu viel. Das sage ich unverblümt, das ist so.« (Schreiner, PE)

Ein vollumfängliches kirchliches Angebot an allen Standorten ließ sich dauerhaft nicht aufrechterhalten. Überlegungen, einzelne Standorte zu schließen, stießen dennoch auf teilweise starken innergemeindlichen Widerstand. Inzwischen sind von den ursprünglich fünf evangelischen Standorten noch zwei geblieben, drei Zentren bzw. Gemeindestandorte sind geschlossen oder untervermietet worden. Zurzeit existieren noch die erste Kirche der evangelischen Gemeinde, die Lätare-Kirche aus den 1970er Jahren mit ihrem großen Gemeindezentrum, mehreren Büros, Wohnungen und Kindergärten, sowie die zuletzt gebaute »Kirche der Herzen« (Schreiner, PE), die Dietrich-Bonhoeffer-Kirche.

In der Anfangszeit Neuperlachs gab es nach der Aussage der Interviewpartner ein reichhaltiges kirchliches Leben. Weil zunächst noch keine Kitas vorhanden waren, wurde zur Kinderbetreuung auf räumliche Kapazitäten der Pfarrwohnungen ausgewichen. Hier betreuten die ersten Erzieherinnen manchmal bis zu 140 Kinder (Rupprecht 2011: 17). Auch die Kindergottesdienste waren gut besucht. Mittlerweile ist der Bedarf an Angeboten für Familien und Kinder stark zurückgegangen; im Gegenzug gibt es eine hohe Nachfrage an Seniorenseelsorge. Entsprechend hat sich der kirchliche Fokus in den letzten Jahren von der Familien- auf die Seniorenarbeit verlagert:

»Die kommen und das boomt, also unsere Seniorenkreise, die könnten wir noch verdoppeln und dann würden wir sie immer noch vollkriegen. Also da ist echt was los.« (Schreiner, PE)

Um die finanziellen Einbußen, die durch den Rückgang der kirchlichen Mitgliedszahlen entstanden sind, partiell aufzufangen, werden die Kirchengebäude auch untervermietet:

»Wir haben z.B. hier in diesem Gemeindezentrum, hier in Lätare haben wir zwei fremde Gemeinden, wir haben die chinesische Gemeinde und wir haben die Adventisten.« (Schreiner, PE)

Während man dem Rückgang der Kirchenmitgliedszahlen auf evangelischer Seite mit der Abwicklung und Nebennutzung von Gebäuden begegnete, verfolgt die katholische Kirche in Neuperlach eine andere Strategie. Die ursprünglich fünf Pfarreien ließen sich zwar nicht als selbständige Größen halten und wurden zu einer einzigen zusammengefasst; die einzelnen Standorte wurden aber beibehalten und sind weiterhin in kirchlicher Nutzung.

## **b) Muslime, Freikirchen**

Die Muslime, die sich im türkischsprachigen VIKZ (Verband der islamischen Kulturzentren) engagieren, haben sich entschlossen, eine Nachbarschaftsmoschee mit dem Namen *Perlach Camii* am Rand von Neuperlach, unmittelbar gegenüber der freikirchlichen Nachbarschaftseinrichtung »Perlacher Herz« zu eröffnen. So gehen sie nach Aussage des Vertreters einer VIKZ-Gemeinde in Hamburg-Altona nur vor, wenn es sich

demographisch lohnt und ein entsprechender Bedarf vorhanden ist (Interview mit Ufuk Hazneci, PE).

Gegenüber der evangelischen Lätare-Kirche und dem benachbarten Einkaufszentrum liegt die *Merkez-Moschee*. Integriert in ein Bürohaus wurde eine gesamte Etage angemietet mit einem eigenen Gebetsraum für die Frauen und einem Wohnbereich für den Imam. Die Organisationsform des muslimischen Lebens im Viertel wird aus Perspektive der hauptamtlichen Vertreter der christlichen Kirchen dabei als schwer zugänglich markiert:

»Es gibt ja keinen Ansprechpartner, es gibt ja keinen, weil die sind ja ganz anders organisiert. Die sind ja nicht als Gemeinde organisiert, die Muslime, sondern die sind ja organisiert als Ort, wo man hinkommen kann, und da kann jeder, der da hinwill, der kann da auch hingehen. Und das sind ja hier, das ist ja nicht eine muslimische Gemeinschaft hier, sondern das sind ja viele.« (Schreiner, PE)

Weitere religiöse Standorte Neuperlachs, die im Rahmen dieser Studie nicht ausführlich oder gar nicht begangen wurden, aber in Interviews Erwähnung fanden, sind die *freikirchliche Vineyard-Gemeinde* sowie die *serbisch-orthodoxe Gemeinde*. Über erstere berichtet der baptistische Pfarrer:

»Das ist eine freikirchliche Bewegung, auch aus den 70ern irgendwie, und die machen hier, bisschen weiter, das nennt sich ›Ein Herz für Perlach‹, die sind also... richtig im Ortsteil angekommen. [...] Die haben ein eigenes Haus und haben also auch durch die ganze Woche Programm. Wie die das genau machen, ich hab mich zwar mit dem Verantwortlichen auch schon unterhalten, ich finde das sehr beeindruckend, aber wie die das genau machen, weiß ich gar nicht.« (Ostermann, PE)

Das Gemeindezentrum der *baptistischen Gemeinde* liegt hingegen direkt gegenüber dem Hochhausring. Erklärtes Gründungsziel war die Nähe zu den Menschen vor Ort, die in den zentralen Gebäudekomplex des Neubauquartiers eingezogen sind.

»In den 1970er Jahren hat die sich entwickelt aus 'nem kleinen Hauskreis. Ist 'ne Teilgemeinde von München Holzstraße, das ist eine größere Baptistengemeinde im Zentrum von München. Und von dort aus wurde die hier sozusagen gegründet. Und das Gemeindehaus ist in den 1980ern gegründet worden, seitdem gibt es die hier offiziell.« (Ostermann, PE)

Das Gebäude der freikirchlichen Gemeinde hat ein Architekt geplant, der zum Zeitpunkt der Studie als über 80jähriger noch im Wohnring gegenüber wohnt. Ebenfalls leben dort noch einige der Gemeindemitglieder, die an der Planung beteiligt und bewusst an den neuen Gemeindestandort hingezogen waren. Heute wird dieser jeden Sonntag an eine vietnamesische Gemeinde untervermietet, die in festlichen Gewändern nach vom Landesverband vorgeschriebenem Ritus ihren Gottesdienst feiert. Trotz der hohen Ambitionen, was ihre Präsenz im Neubauviertel angeht, hat die baptistische Gemeinde vor Ort allerdings kaum Wurzeln schlagen können, wie der Gemeindepfarrer berichtet:

»Wir haben dies Gemeindehaus, das wurde damals schon mit dem Blick auf diese... die wurden damals ganz neu gebaut und es gab auch einige Versuche in der Richtung.



Man muss ehrlicherweise sagen, dass das nie so richtig gelungen ist. Es haben da mal Leute gewohnt und so, das war schon der Wunsch, das ist aber leider letztlich nie gelungen. Das einzige, was es bis heute gibt ist, einmal im Monat sind wir als Gemeinde mit dem Bollerwagen auf den Spielplatz gegangen, der da im Innenraum ist [gemeint ist die Freifläche innerhalb des Wohnrings], und haben da mit den Kindern gespielt und versucht, ins Gespräch zu kommen. Das hat aber nicht so einen richtigen Effekt gehabt.« (Ostermann, PE)

Die meisten Gemeindemitglieder kommen heute aus unterschiedlichen Bezirken Münchens und reisen extra zu den Veranstaltungen an – was von dem Pfarrer durchaus problematisch gesehen wird und nicht seinem Wunsch entspricht, als Gemeinde vor Ort präsent zu sein:

»Es gibt, ich kann jetzt für uns als Baptisten reden, also Bund evangelischer freikirchlicher Gemeinden Deutschland, zunehmend ein Gefühl dafür, dass wir stärker als Ortsgemeinden auch tatsächlich am Ort ankommen müssen. Also so, dass das System, so, wie wir das jetzt über viele Jahrzehnte hatten, dass alle so angefliegen kommen, und dann ist man am Sonntag und auch über die Woche ab und zu mal hier, aber ansonsten lebt man aber eben nicht da, wo die Gemeinde steht. Dass sich das ja auf Dauer ändern werden muss. [...] Weil wir sonst nicht... schönes modernes Wort, weil wir sonst nicht relevant sind. Dann können wir vielleicht versuchen, fromme Leute abzufischen, oder wie man das immer nennen soll, aber so, dass man tatsächlich Menschen erreicht in ihrem tatsächlichen Lebensumfeld, wird dann immer schwieriger.« (Ostermann, PE)

### 1.2.3 Die Neuverhandlung des Zentrums

»Wie gesagt, zentral gibt es hier in dem Sinne gar nichts. Es gibt gar nichts Zentrales, wenn man es genau nimmt.« (Schreiner, PE)

Wie eingangs angemerkt, gehört die Anlage eines Zentrums zu den konstitutiven Elementen einer bedeutungsvollen Raumgliederung. Neuperlach gibt ein solches, baulich ausgestaltetes Zentrum auf den ersten Blick nicht zu erkennen. Den städtebaulichen Mythen und auch der Benennung der entsprechenden U-Bahn-Station (»Neuperlach Zentrum«) nach gibt es allerdings einen geographischen Ort dafür – eine große, unbebaute Fläche außerhalb des Wohnrings, am Hanns-Seidel-Platz.

»Jetzt kommen wir hierauf, auf den Hanns-Seidel-Platz, da hatten die Kirchen großes Interesse daran, da einen Standpunkt zu haben. Weil, das ist ja wirklich das Zentrum. Und eine Kirche im Zentrum zu haben ist immer gut. Und da hat das katholische Ordinariat vor vier, fünf Jahren versucht, da was zu kriegen und da versucht zu verhandeln mit der Stadt oder mit dem Bauträger und so weiter und so fort, und das ist gescheitert, und deswegen haben wir auch den Versuch gar nicht mehr gemacht.« (Schreiner, PE)

Der aktuelle Bebauungsplan sieht vor, neben der U-Bahn-Station Wohnungen und auch ein Kulturzentrum zu errichten. Derzeit wird die Fläche als Parkplatz genutzt, an dessen Rand sich ein kleines, provisorisches Kulturhaus befindet. Das bisherige Fehlen eines

baulich ausgestalteten Zentrums, an dem sich das öffentliche Leben verdichtet, wird von den Ortsansässigen als Manko wahrgenommen.

*Abbildung 2: Städtebauliche Visionen: Ursprüngliche Planung des Hanns-Seidel-Platzes und der Freifläche im Wohnring*

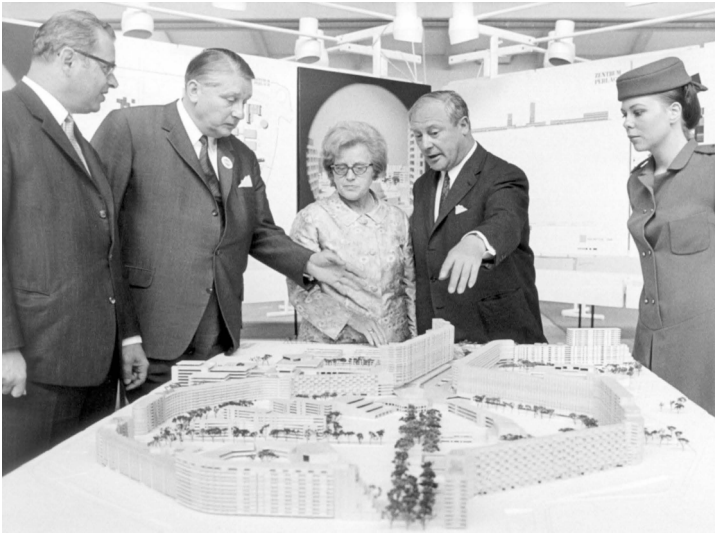

Bild: picture alliance/dpa

»Es gibt bis zum heutigen Tag in Neuperlach kein richtiges Zentrum. Das Zentrum ist der sogenannte Hanns-Seidel-Platz, da ist ein riesengroßer Parkplatz, und dahinter ist ein riesengroßes Einkaufszentrum, das ist das PEP. Und dieser Platz, der Hanns-Seidel-Platz, der ist bis zum heutigen Tag nicht bebaut. Und am elften Mai war der Auftakt zum fünfzigjährigen Jubiläum, da haben wir einen Grundstein gelegt, für ein Kulturquadrat, nennt sich das ganze Ding, das ist auch eine ganz spannende Architektur. Und das sieht [im Entwurf] wunderschön, toll aus. Die bauen da richtig teuer, aber das Kulturzentrum, das weiß immer noch kein Mensch, ob das eines Tages überhaupt entsteht. Die schließen zwar jetzt das [provisorische] Kulturhaus, und die schließen auch das Schauspielhaus, die schließen das alles erstmal, weil ja was Neues entstehen soll, aber das ist überhaupt noch nicht klar, ob das überhaupt gebaut wird. Denn in Wirklichkeit geht es darum [zeigt auf Abbildung]: Wohnen, Loge Nr. Eins. Da versuchen sie jetzt ein bisschen noch gehobeneres Niveau zu machen. Neben dem neuen Kulturzentrum am Hanns-Seidel-Platz, da kostet der Quadratmeter, kann man ja im Internet gucken, 7500 Euro. Das heißt, ich kriege da eine Zweizimmerwohnung für 4–500.000 Euro. Das ist, glaub ich, kein Geheimnis, wenn ich das ausplaudere: Das ist eine große Baugesellschaft, die kommerzielles Interesse hat, und die Sachen, die für die Bevölkerung interessant wären, z.B. das Kulturzentrum, das da hingebaut werden soll, dafür gibt es noch keinen Bauherrn.« (Schreiner, PE)

Zur Grundsteinlegung des neuen, geplanten Zentrums anlässlich der Jubiläumsfeierlichkeiten (50 Jahre Neuperlach) waren neben dem Münchner Oberbürgermeister auch landeskirchliche Vertreter zugegen. Eingeladen hatten der Bauträger und die GEWO-FAG, eine der beiden örtlichen Wohnungsbaugesellschaften. Sogar auf der Titelseite der Süddeutschen Zeitung wird die Grundsteinlegung erwähnt (Ick 2017). Die hohe Bedeutung der Zentrumsfrage zeigt sich nicht zuletzt darin, welche Repräsentanten der Öffentlichkeit zur Grundsteinlegung überhaupt eingeladen wurden und wieviel Redezeit ihnen zugestanden wurde. Der evangelische Pfarrer berichtet diesbezüglich von harten Verhandlungen:

»Wir haben uns da ein bisschen eingeklagt, wir haben da ganz schön Druck gemacht. Wir sollten, drei Minuten haben wir gehabt. Für drei Minuten kommen wir nicht, dann habe ich mit der Dame hier kommuniziert und dann haben wir so lange reden dürfen wie der Bürgermeister auch.« (Schreiner, PE)

Die geplante Bebauung des Hanns-Seidel-Platzes wird von den Vertretern der Kirchen allerdings nicht nur positiv gesehen. Insbesondere bedauern sie, dass diese Entwicklung zu einem Zeitpunkt kommt, zu dem sie nicht mehr in der Lage sind, hier selbst baulich tätig werden zu können.

»Als die ersten Planungen für dieses Jubiläum waren, haben die mir erzählt, dass dieser Hanns-Seidel-Platz jetzt doch bebaut wird. Da war anscheinend die Idee, wenn da jetzt die neue Mitte kommt, dann müsste doch auch die Kirche irgendwo einen Platz haben. [...] Und dann hat der katholische Kollege eine Initiative an sein eigenes Ordinariat gestartet, ob man da irgendwas machen kann, dass da auch eine katholische Kapelle oder so da hineinkommt. [...] Und da hat aber das Ordinariat gestreikt. Die haben gesagt, das ist uns zu teuer, wir können das nicht finanzieren, und auch die Bauträger haben da irgendwie keine guten Konditionen angeboten, dass Kirche da rein könnte. Das ist gescheitert, und deswegen haben wir auch den Versuch gar nicht mehr gemacht. Also wir waren ja sowieso schon außen vor, von der evangelischen Kirche war da gar nicht die Rede.« (Schreiner, PE)

Neben dem Hanns-Seidel-Platz wird allerdings noch ein zweiter Ort als potenzieller Zentrumsanwärter verhandelt. Erinnert sei in diesem Zusammenhang an die Anfangszeiten Neuperlachs. Wie oben erwähnt, hatte Bernt Lauterer, der Architekt des achtseitigen Wohnrings, des städtebaulichen Wahrzeichens des Neubauquartiers, in dessen Mitte ursprünglich ein Zentrum mit Ladenpassagen, Kirche und Bürgerhaus vorgesehen. Gebaut wurden dann tatsächlich das – ursprünglich ökumenische, inzwischen rein katholische – Stephanus-Zentrum und eine Grundschule. Außerdem befindet sich heute am nordwesentlichen Innenrand des Rings die Kontaktstelle des Vereins für Gemeinwesenarbeit und Stadtteilgestaltung ZAK (»Zusammen aktiv in Neuperlach«). Entsprechend findet sich in den Interviews das Narrativ, dass die Mitte des Wohnrings doch das »eigentliche« Zentrum bereits sei und als solches nur wiederentdeckt werden müsse. Insbesondere für die kirchlichen Vertreter ist dieses Narrativ attraktiv, weil sie in Gestalt des Stephanus-Zentrums an diesem Ort baulich bereits präsent sind. Am Tag nach einem ökumenischen Festgottesdienst erzählt der evangelische Pfarrer von einer

Diskussion mit Vertretern der Politik, wo das »eigentliche« Zentrum Neuperlachs liegen würde:

»Ich habe da ja gestern mit dem Herrn Merz und vor allem auch mit dem Herrn Berndt, das ist unser evangelischer..., das ist der stellvertretende Bezirksausschussvorsitzende, noch ein paar Takte geredet. Die haben gesagt, die haben eigentlich den Platz hinter dem PEP, wo wir gestern waren, da, wo das Stephanszentrum ist, eigentlich erst entdeckt. Die haben immer gedacht, eigentlich müsste das alles auf dem Hanns-Seidel-Platz stattfinden, weil da ist ja eigentlich das Zentrum. Da müsste es ja sein, und der ursprüngliche Plan war auch diese Gottesdienstgeschichte und so, das da auf diesem Platz zu machen. Und dann sind die irgendwie draufgekommen, wieso, wir haben doch schon einen funktionierenden Platz. Das ist genau da, wo wir gestern waren. Und dann haben die gesagt, stimmt, das ist eigentlich die Mitte. Die reale Mitte. Die praktizierte Mitte. Und das mit dem Hanns-Seidel-Platz, das ist immer nur Wunschdenken gewesen. Die haben die Mitte nicht bebaut, weil die so wertvoll und so doll ist, dass man das nicht einfach so machen kann, sondern da muss ein Konzept und ein Plan, und jetzt haben sie den Plan, und jetzt kommen sie eigentlich erst darauf, dass das gar nicht die Mitte ist. Die Mitte gibt es ja schon längst [...].« (Schreiner, PE)

So stellt sich die Suche nach dem Zentrum Neuperlachs aus Perspektive der beteiligten Akteure nicht zuletzt als eine Frage der Definitionsheftigkeit dar. Durch gezielte Aktionen – wie die Gestaltung eines Festgottesdienstes, dessen Rahmengestaltung inkl. Bierauschankstelle durch die Wohnungsbaugesellschaft Neuperlachs (WSB) gesponsert wird – tragen die religiösen Akteure aktiv zur Etablierung eines Narrativs bei, demzufolge Neuperlach kein neues Zentrum brauche, weil es bereits eine »praktizierte Mitte« habe.

*Abbildung 3: Links der Ökumenische Gottesdienst auf dem Theodor-Heuss-Platz neben dem Stephans-Zentrum innerhalb des Wohnrings (Juli 2017), rechts die Einladung zur feierlichen Grundsteinlegung des neuen Zentrums Neuperlach auf dem Hanns-Seidel-Platz (Flyer, Ausschnitt)*

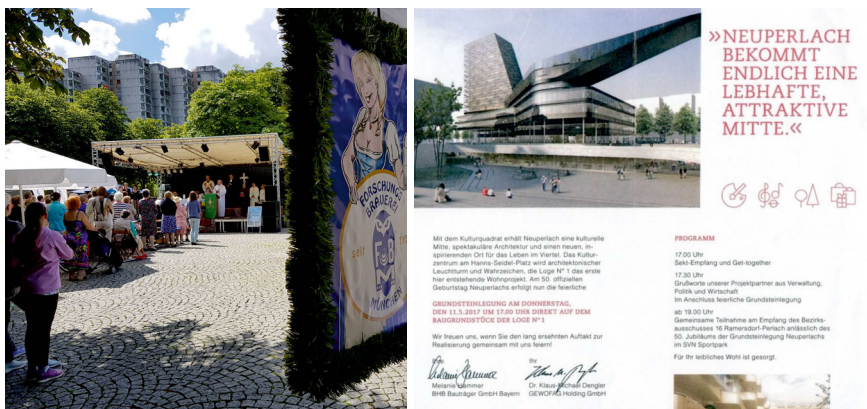

Nicht nur für die Bewohner:innen Neuperlachs, auch für die die religiösen Akteure steht mit der Frage nach dem Zentrum folglich viel auf dem Spiel. Die katholische

Kirche bekäme bei einer Um- bzw. Rückdeutung der Mitte zum Theodor-Heuss-Platz ein kirchliches Zentrum in eben jener Mitte, ohne Gelder dafür generieren zu müssen. Unabhängig von der tatsächlichen weiteren Entwicklung, die wir im Rahmen des Untersuchungszeitraums nicht weiterverfolgen konnten, zeigt das Beispiel Neuperlachs, wie sich das Ringen der ortsansässigen Player um Relevanz in ihrem Anspruch verdichtet, an zentraler Stelle im Quartier präsent zu sein – und im Gegenzug den Ort, an dem sie bereits präsent sind, in seinem Anspruch auf Zentralität zu untermauern.

## 1.2.4 Zwischenfazit: Zentralität als Wesentlichkeitsbehauptung

Wie einleitend dargestellt und durch das Beispiel Neuperlachs veranschaulicht, kommt der Unterscheidung von Zentrum und Peripherie bei der Gliederung des urbanen Raums eine herausgehobene Bedeutung zu. In neuen Stadtquartieren, in denen es kein gewachsenes Zentrum – im Sinne eines alten Dorfkerns oder Markplatzes – gibt, wird die Frage nach der (symbolischen) Mitte dabei zu einer eigenen städtebaulichen Gestaltungsaufgabe. Damit sind eine Fülle von Anschlussfragen verbunden: Wo soll das Zentrum liegen – und auf welche Weise architektonisch umgesetzt werden? Wodurch definiert es sich überhaupt *als* Zentrum: durch seine geographische Lage, durch repräsentative Bauten, durch die Ansammlung von Geschäften und Institutionen oder durch eine Verdichtung des öffentlichen Lebens? Folgende Aspekte sind mit im Spiel, wenn die Zentrums-thematik aufgeworfen wird:

- *Relevanz*: Wer oder was im Zentrum angesiedelt ist, ist von Bedeutung.
- *Dichte*: Im Zentrum verdichtet sich das städtische Leben.
- *Vollständigkeit*: Das Zentrum steht für das Versprechen von Stadt als einer »Totalpräsenz« von Welt.<sup>9</sup>
- *Identifikation*: Mit dem Zentrum verbinden sich identitätsstiftende Erzählungen.
- *Orientierung*: Die Unterscheidung von Zentrum und Peripherie schreibt dem Raum ein Gefälle ein, durch das er les- und handhabbar wird.
- *Ökonomie*: Das Stadtteilmaking braucht ein Zentrum (schon zur Vermarktung »zentrumnaher Lagen«); im Zentrum konzentrieren sich Geschäfte und Einkaufsmöglichkeiten.

Ein Anspruch auf Zentralität kann sich auch primär symbolisch manifestieren. Dies zeigt sich am Beispiel Neuperlachs schon in der Vielfalt von Einrichtungen, die das Wort »Zentrum« im Titel tragen. Neben der U-Bahn-Station Neuperlach Zentrum sind die einzelnen Bauabschnitte mit Zentrumstiteln versehen, wie das Marx-Zentrum oder das Sudermann-Zentrum. Auch die religiösen Einrichtungen heißen St.-Stephanus-Zentrum, St.-Monika-Zentrum, Kirchenzentrum St. Maximilian Kolbe. Selbst die Merkez-Moschee führt das Zentrum im Namen: Merkez bedeutet im Türkischen »das Zentrum«. Hinter dieser Pluralität von Zentrumsanwärtern verbirgt sich eine topographische

9 »Es wäre gleichsam Widerlegung der Stadt, wenn man in ihr vermissen müsste, was es nur andernorts gäbe. Städte suggerieren eine Totalpräsenz, sie dulden kein Abwesendes, lassen vielmehr alles gleichzeitig sein.« (Moxter 2010: 148)

Staffelung: Der Anspruch, zentral zu sein, verweist auf ein Einflussgebiet, das auf eben dieses Zentrum in bedeutsamer Weise hingeordnet ist. Anders gesagt: Ein Zentrum ist immer ein Zentrum *für* eine bestimmte Fläche, eine umgebende Region oder ein Einflussgebiet. Mit der Zentralitätsbehauptung verbindet sich folglich die Imagination eines städtisch Anderen, auf das ein Anspruch erhoben wird. Das kann die ganze Stadt sein (»Stadtzentrum München«), eben ein Quartier (»Zentrum Neuperlach«) oder auch das Sub-Zentrum eines Quartiers (»Sudermann-Zentrum«).

So wie die Gliederung des städtischen Raums insgesamt eingeschrieben ist in das Gefälle von Zentralität und Peripherie, so partizipiert auch die religiöse Topographie an der Spannung von Zentralitätsbehauptung und Marginalitätserfahrung. Am Beispiel Neuperlachs wurde deutlich, wie die religiösen Akteure versuchen, an zentraler Stelle im Quartier eine Präsenz zu entfalten bzw. im Gegenzug die Orte ihrer Präsenz so zu inszenieren, dass diese als zentral erscheinen. Wie im folgenden Abschnitt näher ausgeführt werden soll, behaupten auch in anderen Quartieren religiöse Gemeinschaften den Anspruch auf eine zentrale Stellung im Stadtteil. Teilweise können sie ihn erfolgreich umsetzen, teils machen sie aber auch die Erfahrung, im Widerspruch zu ihrem eigenen Selbstverständnis in eine eher randständige Lage versetzt zu sein.

### 1.3 Religion zwischen Zentralität und Randständigkeit

Religion in neuen Stadtquartieren ist in komplexer Weise auf die Zentralitätsthematik bezogen. Auf der eine Seite sieht sie sich – in Anknüpfung an das Modell der alteuropäischen Stadt – mit der Erwartung konfrontiert, als symbolische Mitte des Lebens auch in räumlich-zentraler Lage präsent zu sein (1.3.1). Auf der anderen Seite hat sie sich *de facto* oft mit einer eher randständigen Position zu arrangieren – sowohl, was ihre öffentliche Relevanz für den Stadtteil, als auch, was ihre räumliche Lage betrifft (1.3.2). Das gänzliche Fehlen religiöser Orte und Praktiken im Quartier kann dabei als empfindliche Lücke wahrgenommen werden (1.3.3).

#### 1.3.1 Religion als symbolische Mitte

In der Suche eines Stadtteils nach seinem Zentrum verbinden sich, wie im Zwischenfazit (1.2.4) angedeutet, unterschiedliche Ebenen miteinander:

»[F]rüher war es ja im klassischen Sinne so, da gab es dann eben einen Marktplatz und eine Kirche, also [das] war so Zentrum, und irgendwo war [damit] auch ein Lebensgefühl ausgedrückt. Hier bin ich zuhause. Und so diese Beheimatung, die muss andere Formen finden, aber trotzdem ist ein Beheimatungsgefühl nicht ganz unwichtig. Auch gerade, wenn eine Stadt möchte, dass man sich wohlfühlt, braucht es eben etwas, was auch in der Stadt Wurzeln schlagen lassen kann. Da ist sicherlich immer noch die Kirche eine wichtige Institution, die einfach viel bieten könnte und kann.« (Erdmann, KA)

Mehr oder weniger ausdrücklich klingt das alteuropäische Stadtmodell mit Marktplatz und Kirchturm im Zentrum an. An die Einrichtung eines religiösen Orts bindet sich dabei der ausdrückliche Wunsch nach »Beheimatung«, nach einem Ankerpunkt für eine

Befestigung der eigenen Biographie (Erne 2010: 192). Religion wird als Zentrumsanwärterin und -markierer adressiert, und zwar sowohl in städtebaulicher als auch in symbolischer Hinsicht. Städtebaulich, da religiöse Bauten aufgrund ihrer im wörtlichen Sinne herausragenden Architektur sich besonders als Orientierungspunkte eignen, an denen sich ein Heimatgefühl festmachen kann. Schon von Ferne verspricht der Kirchturm: Dort bin ich zuhause. Diese städtebauliche Besonderheit religiöser Gebäude ist aber unlösbar mit ihrer symbolischen Bedeutung verknüpft: Ist Religion doch *per definitionem* mit dem Anspruch verbunden, eine tiefere, aufs Letzte und Ganze gehende Deutungsperspektive zu eröffnen. Besonders greifbar wird das in den lebensbegleitenden Kasualfeiern wie Taufen, Konfirmationen, Hochzeiten und Beerdigungen: Das Leben der Beteiligten wird an entscheidenden Wendepunkten in einen religiösen Horizont gerückt, der eine symbolisch vermittelte Verankerung angesichts der Wandlungen und Kontingenzen individueller Biographien und Lebensläufe verspricht.<sup>10</sup>

Die lokale Verankerung solcher lebensbegleitenden Rituale und Feste im Leben des Stadtteils spielt daher für die religiösen Akteure in neuen Stadtquartieren eine große Rolle. In ihr erfüllt sich zumindest teilweise die Verheißung, Religion möge als symbolische Mitte des Lebens auch ein Ort der sozialen Integration der Stadt(teil)gesellschaft sein:

»[I]ch hatte schon vor Jahren mal eine Beerdigung, [...] wo mir das so ein bisschen aufgefallen ist [...]. Und dann stirbt jetzt jemand, damals war es [...] eine ältere Frau, die hier, die innerhalb von zwei Jahren [...] oder drei Jahren ein total tolles soziales Netz aufgebaut hat in ihrem Haus drin. Und dann hat die Beerdigung stattgefunden, und da ist auch der Stadtteil [mit seiner Bewohnerschaft] da mit seiner ganzen Vielgestalt. [...] Und jetzt wieder bei der einen Beerdigung, da war die Frau, die hat zwar nicht im Stadtteil gewohnt, aber die Bewohner, Leute aus [dem sozialen Wohnbauprojekt]. Und da ist auch der Stadtteil [mit seiner Bewohnerschaft] irgendwie da. Und das fand ich ganz interessant.« (Reese, FB)

»Also, [das] passt wirklich zu der Fassade, die Gesichter.<sup>11</sup> Kirche lebt von diesen Menschen. [...] Ich habe es eben auch bei einer Tauffeier [erlebt]. Das heißt, eine Familie kommt. [Sie] möchte ihr Kind taufen lassen im Grundschulalter. Und das ist dann eine Veranstaltung des Stadtteils, weil die einfach vernetzt sind miteinander, und alle [Bewohner des Stadtteils] werden dazu eingeladen.« (Zesche, HDB)

»Oder die Hochzeit von [X] und [Y]. Da waren die Nachbarn selbstverständlich mit dabei. [...] Das sind so [...] neue Sozialbeziehungen.« (Reese, FB)

Unterschiedliche Ebenen der Zentrumsthematik bilden sich hier ab, die sich gegenseitig stabilisieren, aber auch in Spannung zueinander stehen können: der Wunsch nach einem Zentrum des Stadtteils, in dem sich das Leben – auch in symbolischer und ritueller Hinsicht – verdichtet, der Wunsch nach einer symbolischen Mitte als lokalem Bezugs-

10 Die zentrale Bedeutung, die kirchliche Kasualien für die spätmoderne, ganz auf die Bedürfnisse des einzelnen Individuums zugeschnittene urbane Religionskultur besitzen, wird besonders von Wolfgang Steck herausgestellt (Steck 2011: 192ff).

11 Die Fassade des fraglichen Kirchenraums besteht aus Glas, auf dem Gesichter abgebildet sind.

punkt religiöser Glaubenspraxis, aber auch überhaupt der Wunsch nach einer lesbaren, weil bedeutungsvollen Gliederung des urbanen Raums.

In einigen Fällen ist eine solche Gliederung bereits vorgegeben und die religiösen Akteure müssen sich zu dieser vorgezeichneten Raumgliederung verhalten und in ihr Position beziehen. In anderen Fällen wird Religion sozusagen städtebaulich intentional als Zentrumsmarkierer in Anspruch genommen. Ein Beispiel dafür ist die Chapel in Heidelberg, eine ehemalige Militärkaserne, die in ein Bürgerzentrum umgewandelt werden soll (siehe 3.3.2). In vorliegendem Zusammenhang ist von Interesse, dass geplant ist, die Chapel absichtsvoll als neue Quartiersmitte für die Heidelberger Südstadt zu installieren. Die ursprüngliche rein religiös-symbolische Zentralität des Gebäudes soll gleichsam ins Stadtplanerische übersetzt werden. Der ehemals religiöse, jetzt säkularisierte Bau erhält damit eine Zentralität, die er zumindest in dieser Form zuvor gar nicht hatte.

### 1.3.2 Religion in randständiger Lage

Im Kontrast zum Wunsch nach Verankerung einer symbolisch-rituellen Deutungskultur an zentraler Stelle wird in vielen Interviews sichtbar, dass Religion *de facto* eher als randständiges Phänomen im Leben des Stadtteils wahrgenommen wird. Dies kann durch die geographische Lage bedingt sein:

»[Es] wurde[n] dann Partner gefunden, die uns diese Fläche in zentraler Lage [...], damals hieß es, ein Sahnestückchen von der Lage her, verkauft haben. Heute ist es für uns eine Katastrophe, weil, es wird mal Sahnestückchen, aber erst in fünf bis zehn Jahren. Derzeit leiden wir unter der Randlage.« (Vollmer, HDB)

Das Bewusstsein, im Gegensatz zu den eigenen Relevanzansprüchen keine zentrale Stellung im Quartiersleben zu besitzen, kann sich zum Bewusstsein einer regelrechten Exzentrizität steigern, eines Ausschlusses aus dem Zentrum. In Freiburg begründet ein kirchlicher Mitarbeiter diese Exzentrizität mit dem Fehlen eines eigenen Kirchenraums:

»Ich habe so das Gefühl, das ist total marginalisiert. An bestimmten Punkten spielt es eine Rolle, also wenn ich jetzt den Ostergottesdienst in den Blick nehme, wenn wir gemeinsam dann ein Lagerfeuer machen. Und dann geht ein Teil mit hoch zum Gottesdienst und ein Teil bleibt auch unten stehen und der wird immer größer [...]. Aber was wir an Gottesdienstangebot machen, da ist halt immer das Problem, dass wir work in progress sind. Also, dass wir eigentlich nie des leisten können, was die Leute im Prinzip erwarten. Also dadurch, dass kein Kirchenraum da ist, hat es immer das Gefühl, es ist relativ spontan und es ist nichts Festes.« (Reese, FB)

An anderer Stelle erzählt derselbe Mitarbeiter, dass die Kirchengemeinde im Quartier auch deshalb eine randständige Lage hatte, weil andere Akteure des Stadtteils sie in der Vergangenheit als unwichtig dargestellt hätten. Das zeigt sich in der Auseinandersetzung darüber, ob die Gottesdiensttermine der Gemeinde im Kulturkalender des Stadtteils mit erscheinen sollen. Eine Kränkung lag darin, dass nicht die Kirchengemeinde, sondern der Mitarbeiter eines spirituellen Zentrums gebeten wurde, ein Ritual für den Stadtteil zu gestalten:



»Also vom Thema Gottesdienst auf den Kulturkalendern. Das ist immer so eine Fragestellung gewesen, kann, darf das auftauchen innerhalb des Kulturprogramms. Das ist jetzt dieses Jahr nicht mehr so ein Thema, es gehört einfach dazu. Das war ein Bohren dicker Bretter. Im Quartiersbeirat hat man so immer das Gefühl gehabt, man ist halt so ein Anhängsel, aber wenn man nicht da wäre, wäre es auch nicht schlimm.« – »Das war auch mal eine spannende Erfahrung. Es verstarb bei einem Straßenbahnunfall ein [Stadtteilbewohner]. [...] Also, ich wurde von der Quartiersarbeit nicht angerufen, eine religiöse Zeremonie zu feiern. Aber der [Mitarbeiter eines spirituellen Zentrums]. [...] Also, das wird schon als Angebot wahrgenommen. Und das fand ich damals, das hatte ich auch der Quartiersarbeiterin gesagt, nach dem Motto, es ist klar, es ist eine asiatische Religion, das ist nicht meine Zuständigkeit. Das ist in dem Sinn schon richtig. Aber dass ich gar keine Information darüber bekomme und ich gar nicht mehr [mit]gedacht werde, das hat mich eher schon fast verletzt.« (Reese, FB)

Ein weiteres, in mehreren Quartieren der vorliegenden Studie begegnendes Thema ist die Frage der Einbindung von Gottesdiensten und anderen (inter-)religiösen Zeremonien auf Stadtteilfesten. Am liturgischen Ort – zum Festaufakt, zum Festende, mittendrin oder auch ganz außerhalb der säkularen Festliturgie – zeigt sich exemplarisch die Nähe oder auch die Ferne der lokalen religiösen Institutionen zur symbolischen Mitte des Quartiers. Besonders eindrücklich ist das Beispiel einer Gottesdienstfeier in Vauban (Freiburg), die nicht auf dem Stadtteilfest selbst, sondern erst am anschließenden Sonntag stattfindet. Der Wunsch der Kirche, trotz dieses Ausschlusses vom eigentlichen Geschehen Teil des symbolischen Mittelpunkts von Vauban zu sein, findet seinen Ausdruck unter anderem in der Formulierung »Gottesdienst zum Stadtteilfest« (vauban actuel 2015/2). Ein Bezug zu dem (bereits am Vortag gefeierten, nun schon vergangenen) Stadtteilfest wird auch darüber hergestellt, dass dessen Bühne für den Gottesdienst genutzt wird:

*[A]uf dem Platz befindet sich eine Bühne, die noch vom Stadtteilfest ist. Die Rückseite der Bühne ist mit einem Tuch bedeckt, auf dem Worte wie »Stadtteilfest«, »Kinder«, »viele Spielplätze«, »nette Menschen« zu lesen sind. Vor diesem Tuch steht auf der Bühne ein Altar. Auf diesem Altar ist ein Kreuz, das aus Ästen gestaltet ist, links von dem Kreuz befinden sich eine Kerze und Sonnenblumen. Vor der Bühne sind etwa 25 Bierbänke sowie einige Stühle aufgebaut. Die Gottesdienstbesucher sind sommerlich gekleidet und vorwiegend mittleren Alters. Auch einige ältere Menschen und Kinder befinden sich darunter. Der Gottesdienst wird nicht durch Glockengeläut markiert. Der Pastoralreferent begrüßt die Gottesdienstbesucher und weist auf das Liedblatt hin. Während der Gottesdienst gefeiert wird, sind Passanten auf und um den Platz unterwegs. Im Restaurant, das sich im Rücken der Gottesdienstbesucher befindet, essen die Leute weiterhin.*

*Nach der Begrüßung ziehen sich der Pastoralreferent und die Pfarrerin einen weißen Taufschal an, um die Verbindung der beiden Konfessionen zu symbolisieren. Der Pastoralreferent erwähnt, dass gestern das Stadtteilfest gefeiert wurde und heute der Gottesdienst gefeiert wird. Anschließend übermittelt er Grüße anderer Gemeinden. Die Pastorin führt weiter aus, dass sie nicht nur die Gemeinschaft im Stadtquartier feiern möchten, sondern auch feiern möchten, dass die Gemeinschaft im Stadtquartier einen Schritt weiter geht. In den Fürbitten stellt eine der Personen einen Bezug zum Stadtteil her, indem sie sagt, dass der Stadtteil mit seinem Schicksal, seinen Problemen und Konflikten vor Gott gebracht wird. (FFT FB)*

Die programmatische Bezugnahme auf den Stadtteil durch die äußere Gestalt des Gottesdienstes (Festbühne, Bierbänke), die Begrüßung und die Fürbitten steht in Spannung zu seiner zeitlich versetzten Terminierung und zu dem Sachverhalt, dass das Geschehen auf der Bühne von beiläufigen Passanten und Restaurantbesuchern nicht näher gewürdigt wird. An diese Beobachtung knüpft auch eine Interviewpassage mit einem hauptamtlichen Mitarbeiter der Kirche an:

»Und zwar, der Gottesdienst zum Stadtteilstadtteilfest wurde nie als Teil des Stadtteilstadtteilfestes gesehen. [...] Ja, das wurde nie so formuliert. Das war immer am zweiten Tag. Samstag ist Stadtteilstadtteilfest, und danach ist eben irgendwas danach. [...] Und dann wurde auch die Diskussion, gehört der Gottesdienst dazu oder nicht, wurde jedes Mal diskutiert. Seit zwei Jahren jetzt nicht mehr so. Aber jedes Mal wurde diskutiert. Jedes Mal habe ich gesagt: »Hört zu, Leute, wir machen das. Das gehört dazu.« Und dann kam immer das Argument, wenn spirituell, wenn die anderen auch mitmachen dürfen. Habe ich gesagt, ja, dürfen alle gerne mitmachen. Also, im Quartiersbeirat. Wenn ihr mir Personen nennt, die eine spirituelle Feier mit mir machen wollen, dürfen alle dazukommen. Da hat sich nie jemand drauf gemeldet. [...] Aber immer jedes Jahr wieder war diese Diskussion.« (Reese, FB)

Der »Gottesdienst zum Stadtteilstadtteilfest« ist damit auch ein Beispiel für die beständigen Verhandlungen um die öffentliche Legitimation von Religion im Quartier (siehe 6.3.3). Interessant ist auch die erwähnte Forderung aus dem Quartiersbeirat, dass keine bestimmten religiösen Gruppen bevorzugt werden sollen, sondern bei einem »spirituellen« Angebot, »alle« beteiligt sein sollen. Dieser Topos einer normativ geforderten Interreligiosität begegnet häufiger in den untersuchten Quartieren und wird in Kapitel 7 ausführlich dargestellt. Im Zusammenhang mit der randständigen Lage religiöser Orte und den dort stattfindenden Treffen, Ritualen und Veranstaltungen lässt sich festhalten, dass diese zum einen bauliche Ursachen haben und zum anderen durch die Widerstände anderer städtischer Akteure bedingt sind. Zugleich ist diese Randständigkeit nicht festgeschrieben, sondern wandelbar und zum Teil Gegenstand von Verhandlungen.

### 1.3.3 Heilige Lücken

Die herausragende Bedeutung, welche die Frage nach dem Zentrum für ein neues Stadtquartier besitzt, zeigt sich auch und gerade in der Klage, wenn ein solches Zentrum fehlt. Das fehlende Zentrum wird in unterschiedlichen Quartieren der vorliegenden Studie als Problem markiert:

»Die Stadtteile Billstedt und Horn haben eine gemeinsame Herausforderung: Ihnen fehlt jeweils ein attraktives Zentrum. Während in Horn nach den Zerstörungen des Zweiten Weltkrieges vom alten Kern nichts mehr übrig ist, besteht das Billstedter Zentrum heute aus dem Bereich rund um das Einkaufszentrum »Billstedt-Center« und die U-Bahnstation.«<sup>12</sup>

12 <https://billstedt-horn.hamburg.de/entwicklungsraum/>, abgerufen am 29.8.2019.

Das Fehlen eines Zentrums verweist auf einen Mangel an städtischer Infrastruktur. Genau hier ist auch der der Ansatzpunkt für die Einleitung von Stadtentwicklungsmaßnahmen, in denen die alten Ortskerne des Gebietes vitalisiert werden sollen.<sup>13</sup> Mit dem Fehlen des Zentrums steht für die ortsansässige Bevölkerung aber noch mehr auf dem Spiel, wie bereits im vorletzten Abschnitt anklang:

»Und es wäre schon schön, hier mal [eine] Hochzeit durch den Stadtteil laufen zu sehen.« (Spiegel, HDB)

»[I]ch muss [meiner Vorrednerin] Recht geben. [E]s gibt so Sachen, die würde man gerne im öffentlichen Raum wahrnehmen. Also zum Beispiel eine Tauffamilie, die vorbeigeht. Oder ich warte so sehnsüchtig darauf, dass endlich die Kinder mit ihren Schultüten durch den Stadtteil laufen. Das können sie aber erst, wenn die Schule auch da ist. [D]ie wird ja jetzt gebaut. Aber von der Kirche wissen wir, die Kirche an sich wird nicht gebaut. Das heißt, ich kann eigentlich keine Festgemeinde oder auch keine Trauergemeinde, ich kann sie nicht wahrnehmen im Stadtteil, weil sie den Weg nicht antreten hier vor Ort. [Das] ist ja gar nicht [...], dass ich da selber an allem teilnehme, aber trotzdem nimmt man das wahr, und es und findet im Stadtteil statt. Und eigentlich ist ein Stadtteilleben ja ganzheitlich mit vielen Aspekten. Da gehören ja ganz viele Punkte dazu, und bis dato war Kirche eigentlich auch immer präsent.« – »[D]a geht es ja auch los. Wir haben Hochzeiten, wir haben Taufen, wir haben Todesfälle, das sind ja auch alles Dinge, wir haben ja auch andere Familienfeste. [...] Es gibt ja viele Stationen [...], die man durchlaufen kann, und die kann ich ja eigentlich im Stadtteil dann gar nicht machen. [Ich] muss immer aus dem Stadtteil rausgehen.« (Abele, HDB)

Der Wunsch nach einer religiösen Beheimatung im Stadtquartier bildet die Hintergrundfolie der geäußerten Enttäuschung. Der eigene Stadtteil erscheint als religiös defizitär, weil »viele Stationen« der Biographie – von Taufen über Hochzeiten bis hin zu Beerdigungen – hier keinen festen rituellen Ort haben. Deutlich greifbar wird der bereits dargestellte Wunsch, dass die Kirche eine symbolische Mitte im Leben der Stadtteilm Bewohner markieren möge, indem sie durch Feiern, Veranstaltungen, Treffen und Rituale das Leben der Ortsansässigen »von der Wiege zur Bahre« begleitet. Aber es geht noch um mehr: Die Klage über den fehlenden Kirchenbau – nie im eigenen Quartier einen Weihnachtsgottesdienst feiern können! – steht in gewisser Weise selbst noch einmal symbolisch für eine Enttäuschung der urbanen Verheißung, ein »vollständiges« soziales Leben in städtischer Verdichtung leben zu können. Hier gilt ähnliches, wie für die buchstäbliche »Kirche im Dorf« (Möller 2009): Der zentrale Kirchenbau steht für mehr als für seine religiöse Nutzung im engeren Sinn – er markiert die Vollständigkeit und »Totalpräsenz« (Moxter 2010: 148) des sozialen Kosmos. Die heilige Lücke, die der fehlende Kirchenraum markiert, ist daher auch Ausdruck einer Enttäuschung gegenüber dem sozialen Versprechen von Urbanität als solcher.

---

13 Ebd.

## 1.4 Fazit

Religion partizipiert an der für das Phänomen von Stadt insgesamt konstitutiven Unterscheidung von Zentrum und Peripherie. Religion in neuen Stadtquartieren ist damit von vornherein Teil eines größeren Ganzen, einer stadträumlichen Konfiguration, einer bedeutsamen Gliederung des öffentlichen Raums. Unterschiedliche Raumgliederungen überlappen, staffeln und überlagern sich dabei und können auch in Konkurrenz zueinander treten. Beim näheren Hinsehen erweisen sich neue Stadtquartiere als polyzentrische Gebilde mit entsprechend verschachtelten Raumkonfigurationen. Die Dynamik von neuen Stadtquartieren bringt es dabei mit sich, dass diese Gliederungen sich selbst im Wandel befinden, geplante von »praktizierten« Zentren abgelöst werden, ehemals randständige Gebiete in zentrale Lage aufrücken können usw.

Im Idealtyp der alteuropäischen Stadt war Religion dabei nicht nur Teil der städtischen Raumgliederung, sondern stellte zugleich signifikante Elemente ihrer Markierung bereit (Kirche am Marktplatz). Diese Lage hat sich geändert: In neuen Stadtquartieren ist dieser Idealtyp allenfalls rudimentär verwirklicht. Oft bleibt das Zentrum auf nicht absehbare Zeit ungestaltet, unbestimmt und vage. Das bildet sich auch in religiöser Hinsicht ab: Religiöse Einrichtungen führen zwar programmatisch den Zentrumsbegriff im Titel (Gemeindezentrum) – und damit auch den Anspruch auf Öffentlichkeit und Relevanz –, sind aber nur locker in einer (noch) kaum oder unterentwickelten Raumstruktur verankert. Eher selten werden – in Anknüpfung an die Tradition der alteuropäischen Stadt – (ehemalige) religiöse Gebäude explizit als Zentrumsmarkierer von der Stadtplanung in Anspruch genommen.

Dabei ist »Zentrum« (wie auch »Peripherie«) nicht nur stadträumliche Tatsache, sondern immer auch Diskurs: Es werden plurale Zentrumsbehauptungen aufgestellt. Solche Zentrumsbehauptungen enthalten normativ aufgeladene Wesentlichkeitsbehauptungen: Zentral ist das Wichtige, das Wesentliche. Mit dem Anspruch auf Zentralität wird mithin zugleich der Anspruch auf Relevanz, Konjunktur und Prosperität erhoben. Ob und wie eine Zentrumsbehauptung wirksam wird, hängt davon ab, ob und wie sich diese Ansprüche erfüllen. Daher werden in Zentrumsdiskursen – gleichsam spiegelbildlich – oft Erfahrungen von Randständigkeit und Marginalität verhandelt.

Religiöse Gemeinschaften erheben Anspruch auf Zentralität in neuen Stadtquartieren durch Namensgebung (»Kirche in der Bahnstadt«), öffentliche Praktiken (Gottesdienst zum Stadtteilfest) oder provisorische bzw. temporäre Architektur (Bauwagen im Neubaugebiet).<sup>14</sup> Zugleich machen sie die Erfahrung, bei der baulichen Gestaltung der Stadtmitte nicht berücksichtigt zu werden, mit ihren Räumen eher eine randständige Lage zu beziehen und auch um eine symbolische Präsenz »in der Mitte« – etwa bei Stadtteilfesten – kämpfen zu müssen. Insbesondere das Fehlen eines zentralen Kirchbaus kann dabei als Verlust beklagt werden, wobei es wohl um mehr als nur um einen Ort für die gottesdienstliche Praxis geht: Die fehlende Kirche steht als »heilige Lücke« sinnbild-

14 Das letzte Beispiel entstammt nicht dieser Studie, sondern einem Projekt des Kirchenkreises Halle-Saalkreis; <https://www.kirchenkreis-halle-saalkreis.de/aktuell/nachrichten/1-martinsfeier-beim-bauwagenprojekt-in-der-silberhoehe/>, abgerufen am 10.9.2020.

lich für den Paradigmenwechsel vom alteuropäischen Stadt- und Urbanitätsideal hin zur Realität der »Zwischenstadt« (Sieverts 2013).

Die Frage nach der Stadtteilmittle begegnet in fast allen Quartieren der vorliegenden Studie in unterschiedlichen Variationen. Ihre besondere Bedeutung liegt, auf einer Meta-Ebene betrachtet, darin, dass sie einen Interessensschnittpunkt zwischen der Stadtentwicklung, den Investoren und den religiösen Akteuren bildet. Sie alle haben, wenn auch in unterschiedlicher Hinsicht, Interesse an einer bedeutungsvollen Raumgliederung und damit auch Interesse an einem »Zentrum«. Der Zentrumsdiskurs erweist sich damit als produktive Schnittstelle, an der religiöse Akteure mit den anderen Playern vor Ort ins Gespräch kommen, Gestaltungsmöglichkeiten aushandeln und diverse Engagementstrukturen entfalten können.
